# Supplementary material for: Exploration of pain assessment and management processes in oncology outpatient services with healthcare professionals: a qualitative study
Source: PubMed Central journal article supplement — BMJ Open. 2023 Dec 27;13(12):e078619. doi: 10.1136/bmjopen-2023-078619 (PMC10753735; doi:10.1136/bmjopen-2023-078619), 2023-12-27

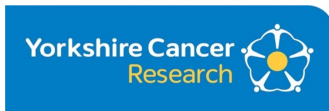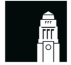

UNIVERSITY OF LEEDS

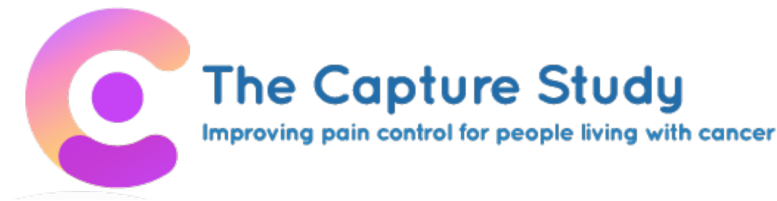

---

## Interview topic guide

---

### ❖ **Professional Background**

*(role, experience, knowledge/training in pain assessment and management, contact with advanced cancer patients)*

### ❖ **Experiences of conducting pain assessments to support to people with advanced cancer**

- Assessment
  - Basic: pain intensity and interference
  - Detailed: underlying aetiology and pain mechanism, linked analgesic prescribing
- Decision-making
- Access to cancer pain management guidelines
- Providing cancer treatments and care
- Communication between oncology and patient
- Follow-up contact between patient and hcp

### ❖ **Identifying triggers for pain assessment**

- *what factors would lead doctor or nurse to undertake a pain assessment*

### ❖ **Specific examples of cancer pain assessments that have been conducted**

- *Talk us through how pain is assessed and managed in practice*

### ❖ **Examples of existing tools used in everyday pain assessment practice**

- *What works with this pain assessment tool or needs improving?*
- *Any challenges with using the tools in everyday practice?*

### ❖ **Anything that is difficult when people have advanced cancer to assess and manage their pain?**

### ❖ **Anything that works well?**

*N.B. Additional questions may be added as the interviews progress and relevant topics begin to be identified from previous interviews conducted.*

Interview topic guide Version 0.1 06.10.2021 IRAS: 305397

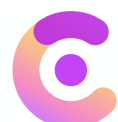



UNIVERSITY OF LEEDS

❖ ***Suggestions for how pain assessment could be improved for people with advanced cancer?***

*To ask participants that have insight and knowledge into existing clinical pathways:*

- ❖ ***Implementing routine pain assessment within existing clinical pathways***
- Describe how a new treatment or procedure is currently integrated into an outpatient service?
  - Who is responsible for making sure everyone is trained and using the new treatment or procedure?
  - How can routine pain assessments be integrated into existing clinical pathways in your oncology outpatient service?
  - Explain what these improvements might make?
  - Any potential system level challenges?

❖ ***Anything you would like to add?***

*N.B. Additional questions may be added as the interviews progress and relevant topics begin to be identified from previous interviews conducted.*

*Interview topic guide Version 0.1 06.10.2021 IRAS: 305397*

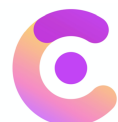

Supplement: bmjopen-2023-078619supp001.pdf [file bmjopen-2023-078619supp001.pdf]
