# Supplementary material for: Exploration of pain assessment and management processes in oncology outpatient services with healthcare professionals: a qualitative study
Source: PubMed Central journal article supplement — BMJ Open. 2023 Dec 27;13(12):e078619. doi: 10.1136/bmjopen-2023-078619 (PMC10753735; doi:10.1136/bmjopen-2023-078619), 2023-12-27
Supplement: bmjopen-2023-078619.draft_revisions.pdf [file bmjopen-2023-078619.draft_revisions.pdf]

# BMJ Open

BMJ Open is committed to open peer review. As part of this commitment we make the peer review history of every article we publish publicly available.

When an article is published we post the peer reviewers' comments and the authors' responses online. We also post the versions of the paper that were used during peer review. These are the versions that the peer review comments apply to.

The versions of the paper that follow are the versions that were submitted during the peer review process. They are not the versions of record or the final published versions. They should not be cited or distributed as the published version of this manuscript.

BMJ Open is an open access journal and the full, final, typeset and author-corrected version of record of the manuscript is available on our site with no access controls, subscription charges or pay-per-view fees (<http://bmjopen.bmj.com>).

If you have any questions on BMJ Open's open peer review process please email [info.bmjopen@bmj.com](mailto:info.bmjopen@bmj.com)

# BMJ Open

## Exploration of pain assessment and management processes in oncology outpatient services with healthcare professionals: a qualitative study

|                               |                                                                                                                                                                                                                                                                                                                                                                                                                                                                                                                                                                                                                                                                                                                                                                                                                                                                                                                                                                                                                                |
|-------------------------------|--------------------------------------------------------------------------------------------------------------------------------------------------------------------------------------------------------------------------------------------------------------------------------------------------------------------------------------------------------------------------------------------------------------------------------------------------------------------------------------------------------------------------------------------------------------------------------------------------------------------------------------------------------------------------------------------------------------------------------------------------------------------------------------------------------------------------------------------------------------------------------------------------------------------------------------------------------------------------------------------------------------------------------|
| Journal:                      | <i>BMJ Open</i>                                                                                                                                                                                                                                                                                                                                                                                                                                                                                                                                                                                                                                                                                                                                                                                                                                                                                                                                                                                                                |
| Manuscript ID                 | bmjopen-2023-078619                                                                                                                                                                                                                                                                                                                                                                                                                                                                                                                                                                                                                                                                                                                                                                                                                                                                                                                                                                                                            |
| Article Type:                 | Original research                                                                                                                                                                                                                                                                                                                                                                                                                                                                                                                                                                                                                                                                                                                                                                                                                                                                                                                                                                                                              |
| Date Submitted by the Author: | 07-Aug-2023                                                                                                                                                                                                                                                                                                                                                                                                                                                                                                                                                                                                                                                                                                                                                                                                                                                                                                                                                                                                                    |
| Complete List of Authors:     | Robinson, Olivia Claire; University of Leeds, Leeds Institute of Health Sciences<br>Pini, Simon; University of Leeds, Psychological and Social Medicine;<br>Flemming, Kate; University of York, Health Sciences<br>Campling, Natasha; University of Southampton, School of Health Sciences<br>Fallon, Marie; University of Edinburgh, MRC Institute of Genetics & Molecular Medicine<br>Richards, Suzanne; University of Leeds, Leeds Institute of Health Sciences<br>Mayland, C; The University of Sheffield, Department of Oncology and Metabolism; Sheffield Teaching Hospitals NHS Foundation Trust<br>Boland, Elaine; Hull University Teaching Hospitals NHS Trust, Palliative Medicine<br>Swinson, Daniel; Leeds Teaching Hospitals NHS Trust, St. James's University Hospital<br>Hurlow, Adam; Leeds Teaching Hospitals NHS Trust, Palliative Care Team<br>Hartup, Sue; Leeds Teaching Hospitals NHS Trust, St. James's University Hospital<br>Mulvey, Matthew; University of Leeds, Leeds Institute of Health Sciences |
| Keywords:                     | Cancer pain < ONCOLOGY, QUALITATIVE RESEARCH, Adult oncology < ONCOLOGY                                                                                                                                                                                                                                                                                                                                                                                                                                                                                                                                                                                                                                                                                                                                                                                                                                                                                                                                                        |
|                               |                                                                                                                                                                                                                                                                                                                                                                                                                                                                                                                                                                                                                                                                                                                                                                                                                                                                                                                                                                                                                                |

SCHOLARONE™  
Manuscripts

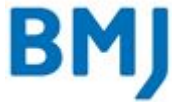

I, the Submitting Author has the right to grant and does grant on behalf of all authors of the Work (as defined in the below author licence), an exclusive licence and/or a non-exclusive licence for contributions from authors who are: i) UK Crown employees; ii) where BMJ has agreed a CC-BY licence shall apply, and/or iii) in accordance with the terms applicable for US Federal Government officers or employees acting as part of their official duties; on a worldwide, perpetual, irrevocable, royalty-free basis to BMJ Publishing Group Ltd ("BMJ") its licensees and where the relevant Journal is co-owned by BMJ to the co-owners of the Journal, to publish the Work in this journal and any other BMJ products and to exploit all rights, as set out in our [licence](#).

The Submitting Author accepts and understands that any supply made under these terms is made by BMJ to the Submitting Author unless you are acting as an employee on behalf of your employer or a postgraduate student of an affiliated institution which is paying any applicable article publishing charge ("APC") for Open Access articles. Where the Submitting Author wishes to make the Work available on an Open Access basis (and intends to pay the relevant APC), the terms of reuse of such Open Access shall be governed by a Creative Commons licence – details of these licences and which [Creative Commons](#) licence will apply to this Work are set out in our licence referred to above.

Other than as permitted in any relevant BMJ Author's Self Archiving Policies, I confirm this Work has not been accepted for publication elsewhere, is not being considered for publication elsewhere and does not duplicate material already published. I confirm all authors consent to publication of this Work and authorise the granting of this licence.

**Title:**

Exploration of pain assessment and management processes in oncology outpatient services  
with healthcare professionals: a qualitative study

**Authors:**

Robinson, OC<sup>1</sup>. Pini, S<sup>1</sup>. Flemming, K<sup>2</sup>. Campling, N<sup>3</sup>. Fallon, M<sup>4</sup>. Richards, SH<sup>1</sup>.  
Mayland, CR<sup>5,8</sup>. Boland, E<sup>6</sup>. Swinson, D<sup>7</sup>. Hurlow, A<sup>7</sup>. Hartup, S<sup>7</sup>. Mulvey, MR.<sup>1</sup>

**Affiliations:**

<sup>1</sup> Leeds Institute of Health Sciences, University of Leeds, Level 10 Worsley Building,  
Clarendon Way, Leeds, LS2 9NL, UK.

<sup>2</sup>Department of Health Sciences, University of York, York.

<sup>3</sup>School of Health Sciences, University of Southampton, Building 67, Highfield,  
Southampton SO17 1BJ, England, UK

<sup>4</sup>Cancer Research UK Edinburgh Centre, MRC Institute of Genetics & Molecular  
Medicine, University of Edinburgh, Edinburgh.

<sup>5</sup>Department of Oncology and Metabolism, University of Sheffield, Sheffield.

<sup>6</sup>Palliative Medicine, Hull University Teaching Hospitals NHS Trust, Hull.

<sup>7</sup> St James's University Hospital, Leeds Teaching Hospitals NHS Trust, Leeds.

<sup>8</sup> Sheffield Teaching Hospitals, NHS Foundation Trust.

## Corresponding author

Olivia Robinson, Leeds Institute of Health Sciences, University of Leeds, Level 10  
Worsley Building, Clarendon Way, Leeds, LS2 9NL, UK.

Email: [o.c.robinson@leeds.ac.uk](mailto:o.c.robinson@leeds.ac.uk).

## Key words

Pain Assessment, Oncology, Outpatient, Cancer Pain, Pain Management, Qualitative,  
Semi-structured interviews.

## Abstract

**Objectives:** This study explored cancer pain management practices and clinical care pathways used by healthcare professionals (HCPs) to understand the barriers and facilitators for standardised pain management in oncology outpatient settings (OS).

**Design:** Data were collected using semi-structured interviews that were audio-recorded and transcribed. The data was analysed using Thematic Analysis.

**Setting:** Three NHS trusts with oncology OS in Northern England.

**Participants:** Twenty HCPs with varied roles (e.g. oncologist, nurse) and experiences (e.g. registrar, consultant) from different cancer site clinics (e.g. breast, lung). Data were analysed using Thematic Analysis.

**Results:** HCPs discussed cancer pain management practices during consultation and supporting continuity of care beyond consultation. Key findings included: (1) HCPs' level of clinical experience influenced pain assessments; (2) remote consulting impeded experienced HCPs to do detailed pain assessments; (3) diffusion of HCP responsibility to manage cancer pain; (4) nurses facilitated pain management support

1  
2  
3  
4 with patients; and, (5) continuity of care for pain management was constrained by the  
5 integration of multi-disciplinary teams.  
6  
7

8  
9 **Conclusions:** These data demonstrate HCP cancer pain management practices varied  
10 and were unstructured. Recommendations are made for a standardised cancer pain  
11 management intervention: (1) detailed evaluation of pain with a tailored self-  
12 management strategy; (2) implementation of a structured pain assessment that  
13 supports remote consultations, (3) pain assessment tool that can support both  
14 experienced and less experienced clinicians. These findings will inform the  
15 development of a cancer pain management tool to integrate within routine oncology  
16 OS.  
17  
18  
19  
20  
21  
22  
23  
24  
25

### 26 **Strengths and Limitations of this study**

- 27  
28  
29 - To our knowledge, this study is the first to qualitative study that has explored  
30 in-depth cancer pain management processes and experiences in oncology  
31 outpatient settings from the perspective of healthcare professionals.  
32  
33  
34  
35  
36  
37 - A structured sampling framework was used to ensure a heterogenous sample  
38 of roles, seniority and clinical speciality were recruited to the study, this enabled  
39 a detailed understanding to different types of pain prevalence patients  
40 experienced.  
41  
42  
43  
44  
45  
46  
47  
48  
49 - Our methodological approach to recruitment may have led to bias, as  
50 participants with strong negative or positive views may have been more likely  
51 to agree to participate to the study.  
52  
53  
54  
55  
56  
57  
58  
59  
60

## Introduction

In the UK, approximately 167,000 people die of cancer each year (1) of whom half will experience moderate to severe pain, and a third are undertreated for their pain (2, 3).

Under-treatment of cancer pain reduces patients' quality of life and increases healthcare service use and costs (3). For patients, the burden of chronic cancer-pain is associated with anxiety, depression (4) and significantly reduces physical and emotional wellbeing (5).

In the UK and Europe, cancer patients are mainly treated at oncology outpatient services (OS), within secondary or tertiary healthcare systems. Care in OS differs from inpatient hospital settings; outpatient clinics are dedicated services patients visit for specific appointments, so their care can be monitored, reviewed and treated by healthcare professionals (HCPs) (i.e. oncologists, nurses). Despite support given to cancer patients at outpatient clinics, uncontrolled cancer pain is the most common reason for contacting GP out-of-hours services (6).

When cancer pain is routinely assessed on hospital wards or in outpatient clinics, this improves pain control for patients (7). The UK Faculty of Pain Medicine has published Core Standards for cancer pain management (8) which state that cancer patients should receive a pain assessment at each encounter with an oncology clinician that covers intensity, mechanisms, aetiology and impact. Yet, oncology literature shows there is currently no standardised procedure for managing pain in an outpatient setting (9). Despite decades of national and international guidelines on cancer pain

1  
2  
3 management (10, 11) inadequate pain assessment continues to be a barrier to good  
4  
5  
6 pain control for patients with cancer. Wider oncology literature has suggested HCPs  
7  
8  
9 required more educational opportunities for prescribing complex pain relief  
10  
11  
12 medications to cancer patients (12).

13  
14 External factors can also influence effective pain management processes. In the UK,  
15  
16  
17 referral to oncology begins in primary care, this is community-based care provided by  
18  
19  
20 general practitioners (GPs). Reduced referrals from primary care during the COVID-  
21  
22  
23 19 pandemic has led to an increase in the numbers of patients diagnosed with  
24  
25  
26 advanced cancer post-pandemic. This has been compounded by staff shortages in  
27  
28  
29 oncology OS and increasing levels of sickness absence and burnout in the workforce  
30  
31  
32 (13). In the UK, minimal qualitative studies have explored current pain management  
33  
34  
35 practices for people with cancer in oncology OS. The aim of this qualitative  
36  
37  
38 investigation was to describe cancer pain management practices and clinical care  
39  
40  
41 pathways for cancer pain management used by healthcare professionals (HCPs) to  
42  
43  
44 understand the barriers and facilitators for standardised pain management in oncology  
45  
46  
47 outpatient settings.  
48  
49  
50  
51  
52  
53  
54  
55  
56  
57  
58  
59  
60



## Methods

### Design

Qualitative interview study exploring pain management practices for people with cancer in oncology OS from the perspective of healthcare professionals (HCPs).

### Research participants

HCPs were recruited from oncology OS in three National Health Service (NHS) trusts in Northern England. Eligible HCPs were required to have at least 6-months experience of managing cancer pain in an oncology outpatient setting. Purposive sampling was used to recruit participants that had varied job roles (oncologist, clinical nurse specialist (CNS)), with a staff sample to reflect different staff grades (consultant, registrar), working from a range of outpatient sub-specialities (lung, breast, bowel). This ensured a broad range of experiences of cancer pain assessment, support and management for patients with differing disease trajectories were included in the sample.

### Recruitment

Eligible HCPs were identified and recruited through co-applicant HCPs embedded within the clinical teams at the respective NHS trusts. Potential participants were emailed a written information sheet explaining the purpose of the study. Interviews

1  
2  
3 were conducted through telephone and video calling software to suit the participants.  
4  
5  
6 Verbal consent was obtained by OR at the beginning of the interview. The consent  
7  
8  
9 audio was recorded and stored separately to the main interview recording.  
10  
11  
12

### 13 **Patient and Public Involvement**

14  
15  
16

17  
18 A patient and public involvement (PPI) group contributed to all aspects of the research  
19  
20 design and delivery. It included people with personal experiences of managing cancer  
21  
22 pain and one former carer. One PPI member was also a grant co-applicant.  
23  
24  
25  
26

### 27 **Data collection**

28  
29

30 Interviews were conducted by OR between March 2022 and May 2022. Sample size  
31  
32 was determined based on previous qualitative studies conducted in oncology OS (14,  
33  
34 15). Recruitment and analysis continued in tandem until data saturation was reached.  
35  
36  
37 An interview topic guide was informed by existing literature and expert input from the  
38  
39 research and Patient and Public Involvement group (see additional file 1). Participants  
40  
41 were asked about their experiences of cancer pain management in oncology OS. This  
42  
43 included exploring current practice, challenges and identifying what could be done to  
44  
45 improve how pain is managed. OR and MM held weekly meetings to discuss the  
46  
47 interviews and influence of the researcher bias on the dataset was documented.  
48  
49  
50  
51  
52  
53  
54  
55  
56  
57  
58  
59  
60

## Data analysis

Data analysis was done using Braun and Clark's Thematic Analysis (16). With consent from participants, interviews were audio-recorded and transcribed verbatim by OR and LA. Analysis was an inductive-deductive process derived from participant interviews to further explore patterns in the dataset. Initial coding and development of themes was done by OR, MM and SP. This was shared with the wider research team and Patient and Public Involvement and Engagement group to develop, review and refine themes. Anonymised verbatim quotes from the data were used to illustrate and give credibility to findings.

## Results

Interviews were conducted with 20 HCPs from three NHS trusts, lasting between 30-minutes to 45-minutes (Table 1. Participant characteristics).

*Table 1. Participant characteristics (N=20)*

| Participant characteristics            |    |
|----------------------------------------|----|
| <i>Healthcare professionals (n=20)</i> |    |
| Male                                   | 8  |
| Female                                 | 12 |
| Role                                   |    |
| Consultant                             | 12 |
| Clinical Nurse Specialist (CNS)        | 3  |
| Registrar                              | 4  |
| Pharmacist                             | 1  |
| <i>Cancer sub-speciality area</i>      |    |
| Urology                                | 2  |
| Prostate                               | 2  |
| Skin                                   | 2  |
| Upper Gastrointestinal tract (GI)      | 2  |
| Haematology                            | 5  |

|        |   |
|--------|---|
| Lung   | 6 |
| Breast | 1 |

## Thematic analysis

Thorough analysis of the transcripts produced two primary themes: (1) *current pain management practices in outpatient consultations* and (2) *delivering continuity of care beyond the oncology consultations* (table 2). Each theme contained four sub-themes to further describe the specific elements of each.

*Table 2. Thematic analysis themes and sub-themes*

| Main theme                                                            | Sub-theme                                                                                                                                                                                |
|-----------------------------------------------------------------------|------------------------------------------------------------------------------------------------------------------------------------------------------------------------------------------|
| <b>Current pain management practices in outpatient consultations.</b> | <b>Staff background influences pain assessment practice.</b> Assessment of pain was influenced by HCPs seniority and experience, often using clinically based judgements to manage pain. |
|                                                                       | <b>Variation in pain management practice.</b> Variation in when and how HCPs approached cancer pain management during consultations, related to time, rapport and location.              |

1  
2  
3  
4  
5  
6  
7  
8  
9  
10  
11  
12  
13  
14  
15  
16  
17  
18  
19  
20  
21  
22  
23  
24  
25  
26  
27  
28  
29  
30  
31  
32  
33  
34  
35  
36  
37  
38  
39  
40  
41  
42  
43  
44  
45  
46  
47  
48  
49  
50  
51  
52  
53  
54  
55  
56  
57  
58  
59  
60

|                                                                   |                                                                                                                                                                                                                                                                                                                                                                                                                                                                                                                                                                                                                                                                                                                                                                                                                                             |
|-------------------------------------------------------------------|---------------------------------------------------------------------------------------------------------------------------------------------------------------------------------------------------------------------------------------------------------------------------------------------------------------------------------------------------------------------------------------------------------------------------------------------------------------------------------------------------------------------------------------------------------------------------------------------------------------------------------------------------------------------------------------------------------------------------------------------------------------------------------------------------------------------------------------------|
|                                                                   | <p><b>Remote consulting impact on pain assessment.</b> HCPs felt remote consultations impeded even experienced HCPs ability to do a detailed pain assessment.</p>                                                                                                                                                                                                                                                                                                                                                                                                                                                                                                                                                                                                                                                                           |
|                                                                   | <p><b>HCP's roles and responsibilities.</b> Varied responsibility felt by HCPs to manage cancer pain.</p>                                                                                                                                                                                                                                                                                                                                                                                                                                                                                                                                                                                                                                                                                                                                   |
| <p><b>Continuity of care following oncology consultations</b></p> | <p><b>Utilisation of outpatient oncology CNS.</b> HCPs felt oncology CNS had more time to build rapport with patients outside the consultation, and provide a personalised continuity of care making patients more willing to openly disclose their pain.</p> <p><b>Integration of supportive services.</b> Optimal pain management involved HCPs identifying and monitoring pain whilst utilising supportive services (i.e. pain management teams) for advice and guidance to develop appropriate treatment pathways.</p> <p><b>Re-assessment and monitoring of cancer pain between primary and secondary care.</b><br/>Outpatient clinicians' opportunity to re-assess and monitor cancer pain is constrained by the frequency of appointments.</p> <p><b>Self-management plans to manage cancer pain at home.</b> HCPs created self-</p> |

|  |                                                                                   |
|--|-----------------------------------------------------------------------------------|
|  | management plans for patient to ensure their cancer pain was adequately reviewed. |
|--|-----------------------------------------------------------------------------------|

## Current pain management practices in outpatient consultations

Participants reported factors such as time, rapport, mode of assessment (i.e. telephone) and diffusion of responsibility influenced the extent pain management was explored with patients.

### Staff background influences pain assessment practice

Assessment of pain in outpatient clinics was influenced by individual HCP's seniority and experience. Experienced consultants expressed confidence assessing and treating cancer pain because it was an area of care they *"do a lot of"*[P012]. Experienced HCPs stated *"I don't use any pain guidelines"*[P011] or *"I just pull on my own experience"*[P013] to describe how pain was assessed in practice. Senior staff appeared more likely to use tacit knowledge in addition to drawing on clinically based observations (i.e. non-verbal behaviours) and conversations with the patient before determining an appropriate treatment plan:

*"They [the HCP] might be looking at how far can you lift the leg, the pressure that they can put on the leg and how much feeling there is on the leg" P004 [CNS, haematology clinic]*

HCPs used open-ended questions that *"triggered"*[P011] patients to discuss pain or discomfort followed by an assessment for severity of pain. Using a verbal description of a numerical pain intensity scale encouraged patients to *"score it, 0-10"*[P009]. Yet,

1  
2  
3 several HCPs felt pain scales did not provide a valid representation of a patient's pain  
4  
5  
6 because the subjective nature of pain made it *"difficult to apply to numbers"*- [P006].  
7  
8 Asking questions associated with the type of cancer, initiated patients to think in-depth  
9  
10 about the context, triggers, occurrences and nature of the pain:  
11  
12

13  
14 *"Thoracic cancers I'd always ask about chest pain specifically and risk of pain*  
15  
16 *or swelling outside of the chest and with gynaecological cancers I'd say "have*  
17  
18 *you had any abdominal pain or bloating" P008 [Registrar, lung clinic]*  
19  
20  
21  
22  
23  
24  
25

#### 26 Variation in pain management practice

27  
28  
29 There was variation in when and how HCPs approached cancer pain management  
30  
31 during consultations, related to time, rapport and location. Participants stated pain  
32  
33 management conversations required *"empathy and sensitivity"* – [P001], yet  
34  
35 developing the necessary rapport took time. Participants suggested patients received  
36  
37 pain assessments at different points in a care journey, i.e. initial or follow-up  
38  
39 consultations. HCPs acknowledged the extent to which pain management was  
40  
41 approached and communicated to patients depended on specific diagnosis groups  
42  
43 with differing levels of associated pain. If HCPs were seeing a *"new cancer patient*  
44  
45 *with less pain"*- [P008] consultants prioritised other areas of the patient's care (i.e.  
46  
47 arranging treatment, discussing patient concerns):  
48  
49  
50  
51  
52  
53  
54  
55  
56  
57  
58  
59  
60



1  
2  
3  
4 *"If I'm consenting them for radiotherapy a lot of them won't really be having any*  
5  
6 *pain, so you know I'll ask, and if they're saying no, then that's fine" P008*  
7

8  
9 *[Registrar, Lung clinic]*  
10

11  
12 HCPs suggested discussing other areas of cancer-related care meant opportunities  
13  
14 for an in-depth, detailed pain assessment were potentially lost. For patients with  
15  
16 specific cancer types, where pain was highly prevalent, HCPs tacit pain assessment  
17  
18 identified pain management as a priority. HCPs made clinical judgements on the  
19  
20 extent and timing of pain management discussions. This included recognising when  
21  
22 external factors could potentially exacerbate pain, for example, "*frailty in older patients,*  
23  
24 *comorbidities or smoking*" - [P003].  
25  
26  
27  
28  
29

30  
31 *"Some patients are straightforward. Whereas a lot of lung patients have been*  
32  
33 *heavy smokers. They've got COPD and ischemic heart disease...where you*  
34  
35 *really have got to get into conversations about pain in a big way" P003*  
36  
37  
38

39 *[Consultant, haematology clinic]*  
40

41  
42 HCPs suggested follow-up consultations were variable and depended on the care  
43  
44 needs and severity of the patient's cancer. For patients with advanced cancer that  
45  
46 were seen weekly it could be easier to monitor and explore pain. HCPs described  
47  
48 difficulties with building rapport to explore pain when appointments were infrequent  
49  
50 and patients did not see the same HCP at follow-up appointments.  
51  
52  
53  
54  
55  
56  
57  
58  
59  
60

### Remote consulting impact on pain assessment

Management of oncology outpatient care has changed since COVID-19 pandemic and more consultations are conducted remotely. HCPs described advantages to remote consulting as it enabled easier, more frequent contact with patients and supported continuity of care:

*"We would, you know put that as part of our diary for the following day to call back and see. Make sure that it was working" P005 [CNS, upper GI clinic]*

However, some HCPs found remote consulting prevented non-verbal observations of pain and experienced clinicians recognised that this impeded their ability to do a detailed pain assessment:

*"And saying to a patient, is it the lumbar region? Why would they know that" P004 [CNS, haematology clinic]*

HCPs described a risk of patients misattributing cancer-related pain for side effects and symptoms during remote consultations, making it challenging to provide appropriate treatment. HCPs had to *"take [it] on the patient's own word"*-[P002] feeling there was *"no other option"*- [P002]. Some HCPs felt pain assessments began from observations of non-verbal cues when *"they call the patient from the waiting room"*- P011, which was not possible in telephone consultations. This contributed to the overall judgement of the patient's pain:

1  
2  
3  
4 *“You notice whether they’re in a wheelchair, how they’re able to get out of their*  
5  
6 *chair, whether they can walk down the corridor as fast or slower than you can”*  
7  
8  
9 *P018 [Consultant, breast clinic].*

#### Healthcare professional’s roles and responsibilities

10  
11  
12  
13  
14  
15  
16  
17  
18 There was a diffusion of responsibility when HCPs discussed pain management. Due  
19  
20 to other community-based HCPs (i.e. GPs, palliative care teams) also being able to  
21  
22 monitor and manage a patient’s pain, some oncologists in secondary care felt it was  
23  
24 not their responsibility therefore did not engage in detailed pain conversations, e.g. it  
25  
26 was a *“community palliative nurse’s job to manage pain”- [P003]*. However, HCPs did  
27  
28 not want to put a patient at risk of uncontrolled pain whilst they were waiting to discuss  
29  
30 this pain with the patient’s community teams and thus developed a self-management  
31  
32 plan for the patient to follow:  
33  
34  
35  
36  
37  
38

39  
40 *“You’re thinking about, well, the patient could be suffering tonight. You know, I*  
41  
42 *can maybe address some of these issues now” P003 [Consultant, haematology*  
43  
44 *clinic].*

45  
46  
47  
48 Some HCPs described how patients needed to take *“ownership”-[P014]* and  
49  
50 *“responsibility”-[P003]* to disclose if they were experiencing pain because patients  
51  
52 often withheld the extent of their pain due to *“fears of bothering the clinician”- [P008]*  
53  
54 making it more challenging to accurately assess and manage. In some instances,  
55  
56  
57  
58  
59  
60

1  
2  
3  
4 HCPs felt patients needed to provide honest opinions to support a thorough  
5  
6 assessment and avoid uncontrolled pain:  
7  
8

9  
10 *"You know autonomy to the patient and responsibility to the patient to tell you if*  
11  
12 *there's a problem you know" P014 [Registrar, upper GI clinic]*  
13  
14

### 21 22 **Continuity of care following outpatient consultations**

23  
24 Participants indicated continuity of care for pain management was facilitated by CNS,  
25  
26 relationships between oncology HCPs and supportive services (i.e. palliative care  
27  
28 teams, pain management services), re-assessment and monitoring of cancer pain  
29  
30 between primary and secondary care and self-management plans to manage cancer  
31  
32 pain at home.  
33  
34  
35  
36

### 37 38 **Utilisation of outpatient oncology CNS**

39  
40 Most registrars and consultants entrusted CNS with following up patients and  
41  
42 providing pain management support beyond their initial consultation with an  
43  
44 oncologist. This was a component of the CNS role to undertake follow-up remote  
45  
46 consultations (i.e. telephone or video call) including the re-assessment of pain and  
47  
48 other symptoms:  
49  
50  
51  
52

53  
54 *"I have the support of CNSs, it will be within days [referring to follow-up calls],*  
55  
56 *you know hopefully within a week then I have somebody else checking in on*  
57  
58  
59  
60

1  
2  
3  
4 *them as to whether medication levels need increasing” P007 [Consultant,*  
5  
6 *prostate clinic].*  
7  
8

9 Consultants reflected on a CNS ability to build rapport with patients and provide a  
10 personalised continuity of care making patients more willing to openly disclose their  
11 pain. One example showed CNS identifying problematic pain with a patient and  
12 escalating this to the consultant to be explored further at follow-up consultations so  
13 changes can be made to medication:  
14  
15  
16  
17  
18  
19  
20  
21

22  
23 *“If there's a note or a, verbal reminder [referring to a nurse providing notes to a*  
24 *consultant about a patient's pain]. Actually, they have had some problems with*  
25 *pain or this particular issue then that definitely works well” P011 [Consultant,*  
26 *haematology clinic].*  
27  
28  
29  
30  
31  
32  
33

34 If there were little or no CNS staff available to support the management of pain  
35 following consultations with an oncologist, participants suggested it placed strain on  
36 other HCPs to fulfil this role. Consultants and registrars expressed concerns for having  
37 *“triple booked clinics”- [P003]* and calling patients *“three hours after their appointment*  
38 *time”-[P003]* when there were no CNS staff to support clinics.  
39  
40  
41  
42  
43  
44  
45  
46  
47  
48  
49  
50

#### 51 Integration of supportive services

52 Relationships between supportive services (i.e. palliative care, community nursing  
53 teams and pain team) and oncology HCPs were essential to cancer pain management.  
54  
55  
56  
57  
58  
59 While HCPs expressed confidence in their ability to identify and treat cancer pain,  
60

1  
2  
3 there were circumstances where HCPs described “*reaching their limits*”- [P012] on  
4  
5 providing recommendations on complex opioid medication and required specialist  
6  
7  
8 support:  
9

10  
11  
12 *“we’re used to drugs like Gabapentin, Amitriptyline but when patients are still*  
13  
14 *having pain, that’s when you need help and we’re lucky, we can ring the palliative*  
15  
16 *care team and there is somebody that can review the patient...usually you can get*  
17  
18 *access to that specialist advice if you need”.*P012 [Consultant, lung clinic]  
19  
20  
21

22 In some cases, the level of responsibility and expertise the clinician felt they had over  
23  
24 managing a patient’s pain (i.e. pain was important part of consultation discussions)  
25  
26 influenced whether a patient would be referred to another team or managed by  
27  
28 themselves. Data suggested optimal pain management often involved HCPs  
29  
30 identifying and monitoring pain whilst utilising supportive services for advice and  
31  
32 guidance to develop appropriate treatment pathways.  
33  
34  
35  
36  
37  
38  
39  
40  
41

42 Re-assessment and monitoring of cancer pain between primary and secondary  
43  
44 care  
45  
46

47 Inpatient ward settings enabled HCPs to regularly re-assess cancer pain and make  
48  
49 amendments to medication more frequently. In OS a clinicians’ opportunity to re-  
50  
51 assess and monitor cancer pain was constrained by the frequency of appointments on  
52  
53 weekly, monthly or greater basis. Some oncology OS support patients from “*large*  
54  
55 *geographical areas*”-[P005] therefore patients might not return for consistent follow-up  
56  
57  
58  
59  
60

1  
2  
3  
4 appointments. Participants reported this made it difficult for HCPs to provide continuity  
5  
6 of care and put more dependency on managing cancer pain between primary and  
7  
8 secondary care:  
9

10  
11  
12 *“What we don't have a mechanism like we do on the ward... We simply don't*  
13  
14 *have that contact, so we are next seeing the patients usually in three or six*  
15  
16 *weeks' time. So the pattern of medical interaction it simply doesn't map on to*  
17  
18 *pain relief” P018 [Consultant, breast clinic]*  
19  
20  
21

22  
23 HCPs emphasised pain management decisions needed to be made in line with the  
24  
25 patient's needs and their ability to conveniently access primary care. As a result of  
26  
27 this, patients and HCPs often had to *“rely on the GPs to issue drugs and escalate pain*  
28  
29 *control”- [P014].*  
30  
31  
32

33  
34 *“We would also encourage patients to seek support from the GP and there will*  
35  
36 *come a time when it's beyond our scope” P005 [CNS, upper GI clinic]*  
37  
38  
39  
40  
41  
42

43  
44 Self-management plans to manage cancer pain at home

45  
46 Due to the challenges with assessment and re-assessment in OS, some HCPs  
47  
48 suggested providing a *“safety net”-[P016]*for the patient was a crucial aspect to ensure  
49  
50 cancer pain was adequately reviewed. This involved developing a strategy so a patient  
51  
52 knew what to do if the pain relief was not effective or if they were still experiencing  
53  
54 severe pain:  
55  
56  
57  
58  
59  
60

1  
2  
3  
4 *"I want you to see how those go and then perhaps give them a time period, so this*  
5  
6 *is gonna take a few days for this to start to work better. If things are not any better,*  
7  
8 *then to call us back" P016 [Consultant, haematology clinic]*

10  
11 Some HCPs provided patients with documentation that included information on how,  
12  
13 when and what medication to take, as well as contact information for the OS and out-  
14  
15 of-hours services. This was one-way HCPs ensured patients were supported to self-  
16  
17 manage cancer pain at home:  
18  
19

20  
21  
22 *"If there is anything of concern there is a number that you can call 24 hours a*  
23  
24 *day, 7 days a week, 365 days a year and then we can see them on the acute*  
25  
26 *unit and take it from there" P006 [Registrar, urology clinic]*  
27  
28  
29  
30  
31  
32  
33  
34  
35  
36  
37  
38  
39  
40  
41  
42  
43  
44  
45  
46  
47  
48  
49  
50  
51  
52  
53  
54  
55  
56  
57  
58  
59  
60



## Discussion

We found an unstructured and variable approach to pain management affected multiple components of a patient's outpatient cancer care. Firstly, HCPs used clinical judgement in place of a structured assessment to manage a patient's pain. This explains why HCPs might not use pre-existing guidelines and tools that have been published (10, 11). Research has highlighted disadvantages to using pain assessment tools, such as oversimplification of the multi-dimensional pain experience and not an appropriate reflection of a patient's pain (17). Pain management tools can be efficient especially when HCPs have limited time or when pain assessments are combined with individualised assessment to fully understand how pain is affecting the patient physically, psychologically, socially and culturally.

As shown in this study, the diffusion of responsibility that the respective healthcare professional placed on managing a patient's pain influenced the extent pain was explored with patients. Implementation of a structured pain assessment used by all HCPs ensures all patients receive a consistent thorough assessment of pain. This could be used in conjunction with the recognition of non-verbal cues and open-ended questions to explore the patient's pain in more detail. We found variation across the roles and responsibilities of HCPs supporting the continuity of pain management. Oncology outpatient literature suggests some HCPs perceived their primary duty was to provide patients with their disease status and have conversations around treatment (18). However, our data shows that HCPs who expressed clinical responsibility around

1  
2  
3  
4 pain management were inclined to develop self-management plans to support patients  
5  
6 to manage cancer pain at home.  
7  
8

9 This study aimed to describe current pain management and thus the interview topic  
10  
11 guide was not developed to explore nuances of self-management practices.  
12  
13

14 However, we know from previous studies there is variation in self-management  
15  
16 approaches (19). In OS, development of self-management support for patients is  
17  
18 crucial to a continuity of care. This includes providing elements of educational  
19  
20 interventions to facilitate problem solving and adequate decision-making skills and  
21  
22 tailoring recommendations to the individual's situation and defining goals with action  
23  
24 plans (19). By developing supportive plans, it ensures patients understand what to do  
25  
26 if pain escalates or becomes unmanageable. Subsequently, it could encourage  
27  
28 patients to initiate re-assessment of their pain at primary and secondary care services.  
29  
30  
31  
32  
33  
34

35  
36 We found system-level challenges impacted the extent to which pain was explored  
37  
38 with patients and monitored by outpatient HCPs. Exacerbated by the impact of the  
39  
40 COVID-19 pandemic, clinics are often over-booked, short staffed, and have long  
41  
42 waiting lists (13). In addition, our data show that the complexity surrounding the  
43  
44 interface between primary and secondary care and challenges with integration of  
45  
46 multi-disciplinary teams meant continuity of care, in particular re-assessment and  
47  
48 monitoring of pain, was difficult as patients were referred back to primary or community  
49  
50 care teams.  
51  
52  
53  
54  
55  
56  
57  
58  
59  
60

1  
2  
3  
4 Oncologists found it difficult to build rapport with patients that might not return to  
5  
6 outpatient appointments and felt they had to prioritise topics of care with the limited  
7  
8 time they had. Consultations take a patient-centred approach that prioritises care  
9  
10 practices that are responsive to a patient's preferences and values and thus not  
11  
12 focusing on pain management may be appropriate for some patients. However, this  
13  
14 study and previous research has highlighted patients can often be reluctant to express  
15  
16 their concerns and preferences without prompting (9). This suggests the development  
17  
18 of rapport with patients is essential to gain full understanding of a patient's care needs.  
19  
20 We found CNS had more opportunities to build rapport and have discussions about  
21  
22 pain with patients. However, in line with previous studies (12) opportunities for pain  
23  
24 management discussions are often missed if there are nurses with less experience  
25  
26 and confidence to conduct pain assessments. Recommendations from this study  
27  
28 highlight the benefit of providing training for HCPs to support pain management  
29  
30 conversations and embedding this within routine clinical practice.  
31  
32  
33  
34  
35  
36  
37  
38  
39

40  
41 Oncology literature has highlighted the benefits for the use of remote consultations in  
42  
43 cancer pain management, where it is used appropriately. For example, reduction in  
44  
45 pain severity scores, cost-effective, improved accessibility for patients to receive HCP  
46  
47 advice and treatment of symptoms and aided monitoring and re-assessment of  
48  
49 symptoms (20, 21). We found adaptations to pain assessments for remote care  
50  
51 impeded experienced HCPs to do a detailed thorough pain assessment, especially if  
52  
53 not Audio Visual (AV) facilitated. HCPs become experts in their field through  
54  
55 knowledge, skill, training and experiential learning (22). Since COVID-19 the increased  
56  
57  
58  
59  
60

1  
2  
3 use of remote consultations has meant HCPs have to spend more time doing pain  
4 assessments remotely. However, due to a lack of experiential learning for conducting  
5  
6 pain assessments through remote consultations, this potentially made even  
7  
8 experienced HCPs feel like a novice. This coincides with the novice to expert theory  
9  
10 (22). Similarly, for those with less experience a change in mode-of-consulting could  
11  
12 further impede thorough pain assessments for patients. Without additional support and  
13  
14 structured guidance on how to conduct remote consultations there is a risk that  
15  
16 patients' pain will not be appropriately managed and key components of a detailed  
17  
18 pain assessment potentially missed. Previous research has shown even when pain  
19  
20 assessments are standardised and detailed, only modest improvements in pain for  
21  
22 patients with cancer are observed, largely because of low delivery fidelity and poor  
23  
24 implementation (10). However, Fallon et al. (2018) demonstrated that when  
25  
26 standardised pain assessment processes are integrated within routine clinical practice  
27  
28 at the level of the service (rather than at an individual clinician level) this leads to  
29  
30 greater improvements in pain outcomes for patients and more appropriate analgesic  
31  
32 prescribing. This suggests an in-depth implementation plan at service-level would be  
33  
34 crucial to the success of a structured pain management intervention.  
35  
36  
37  
38  
39  
40  
41  
42  
43  
44  
45  
46  
47  
48  
49  
50

## 51 Strengths and limitations

52  
53 A structured sampling framework was developed by the research team which may  
54  
55 have resulted in potential bias. However, this approach provided a heterogeneous  
56  
57  
58  
59  
60

1  
2  
3  
4 sample of staff roles, seniority and clinical speciality that gave a greater understanding  
5  
6 to the management of different types of pain prevalence patients experienced. A  
7  
8 limitation of our methodological approach is related to recruitment bias; due to the  
9  
10 nature of the research aims (i.e. pain management in oncology) participants with  
11  
12 strong negative or positive views may have been more likely to agree to participate.  
13  
14  
15 However, the themes identified from the data indicated broad perspectives of pain  
16  
17 management processes and experience, so it is unlikely that we have sampled an  
18  
19 exclusively polarised group of participants.  
20  
21  
22  
23  
24  
25  
26  
27  
28  
29

#### 30 Implications of clinical research and practice

31 Faculty of Pain Medicine Core standards for cancer pain management (8) state all  
32  
33 patients should receive a pain assessment at each encounter with an oncology  
34  
35 clinician that includes exploration of intensity, mechanisms, aetiology and impact.  
36  
37 Evidence from clinical trials show that standardising pain assessment in oncology  
38  
39 outpatient clinics leads to improvements in patients' pain and quality of life (7). This  
40  
41 research recommends the implementation of a structured routine pain assessment  
42  
43 that enables all HCPs using different modes of consultations to incorporate the most  
44  
45 crucial components of a pain assessment within the limited time they have. Secondly,  
46  
47 at a service level, uncontrolled cancer pain remains the most common reason for  
48  
49 contacting GP out-of-hours service (6). Implementing a structured pain assessment  
50  
51 within oncology OS would encourage patients to report pain earlier, enabling HCPs to  
52  
53  
54  
55  
56  
57  
58  
59  
60

1  
2  
3 manage cancer pain earlier, reducing the burden on GP out-of-hours service, and  
4  
5  
6 minimising the risk of patients living with undertreated cancer pain.  
7  
8

### 9 Conclusion

10  
11 This study demonstrates a variable and unstructured approach to pain management  
12  
13 affected multiple components of a patient's outpatient cancer care. We recommend  
14  
15 the need for a cancer pain management intervention that standardises pain  
16  
17 assessments in oncology OS, which is implemented at the level of the service. This  
18  
19 will ensure each patient receives the same detailed evaluation of cancer pain and is  
20  
21 provided with a self-management strategy that facilitates pain management beyond  
22  
23 consultations.  
24  
25  
26  
27  
28  
29  
30  
31  
32  
33

### 34 List of abbreviations

35  
36  
37 HCP – Healthcare Professionals  
38

39  
40 OS – Outpatient Services  
41

42  
43  
44 CNS – Clinical Nurse Specialist  
45

46  
47 Upper GI - Upper Gastrointestinal tract  
48

49  
50  
51 NHS – National Health Service  
52

53  
54 AV – Audio Visual  
55  
56  
57  
58  
59  
60

## Declarations

### **Ethical approval and consent to participate**

Ethical approval was obtained by University of Leeds, Faculty of Medicine Research Ethics Committee and Health Research Authority (21/HRA/5245). Approvals were also obtained at each NHS trust.

### **Consent for publication**

Not applicable

### **Availability of data and materials**

Not applicable

### **Competing interests statement**

None declared.

### **Funding**

This work was supported by Yorkshire Cancer Research grant number L428.

### **Authors' contribution**

1  
2  
3  
4 MM is the chief investigator for this study; he conceived the project, led the design and  
5  
6 writing of the study protocol, facilitated data analysis and drafting of this manuscript.  
7  
8

9  
10 OR facilitated the writing of the study protocol, including drafting the topic guide,  
11  
12 completed data collection and transcribed interviews. OR led the data analysis  
13  
14 facilitated by MM, SP, KF, SR, NC. OR wrote the first draft of the manuscript. All  
15  
16 authors contributed to manuscript revision, read and approved the submitted version.  
17  
18

### 19 20 **Acknowledgements** 21

22  
23  
24 Lynn Auty (LA) contributed to the interview transcription.  
25

26  
27 Patient and Public Involvement Group (JG, JP, CA, PD),  
28

29  
30 NHS Trusts: Leeds Teaching Hospitals, Hull University Teaching Hospital, Sheffield  
31  
32 University Teaching Hospital  
33  
34  
35  
36  
37  
38  
39  
40  
41  
42  
43  
44  
45  
46  
47  
48  
49  
50  
51  
52  
53  
54  
55  
56  
57  
58  
59  
60



## References

1. Cancer Research UK. Cancer Mortality Statistics. (2017-2019).
2. van den Beuken-van Everdingen MH, de Rijke JM, Kessels AG, Schouten HC, van Kleef M, Patijn J. Prevalence of pain in patients with cancer: a systematic review of the past 40 years. *Ann Oncol.* 2007;18(9):1437-49.
3. Shen WC, Chen JS, Shao YY, Lee KD, Chiou TJ, Sung YC, et al. Impact of Undertreatment of Cancer Pain With Analgesic Drugs on Patient Outcomes: A Nationwide Survey of Outpatient Cancer Patient Care in Taiwan. *J Pain Symptom Manage.* 2017;54(1):55-65 e1.
4. Kroenke K, Zhong X, Theobald D, Wu J, Tu W, Carpenter JS. Somatic symptoms in patients with cancer experiencing pain or depression: prevalence, disability, and health care use. *Arch Intern Med.* 2010;170(18):1686-94.
5. Wang HL, Kroenke K, Wu J, Tu W, Theobald D, Rawl SM. Cancer-related pain and disability: a longitudinal study. *J Pain Symptom Manage.* 2011;42(6):813-21.
6. Adam R, Wassell P, Murchie P. Why do patients with cancer access out-of-hours primary care? A retrospective study. *Br J Gen Pract.* 2014;64(619):e99-104.
7. Fallon M, Walker J, Colvin L, Rodriguez A, Murray G, Sharpe M. Pain Management in Cancer Center Inpatients: A Cluster Randomized Trial to Evaluate a Systematic Integrated Approach-The Edinburgh Pain Assessment and Management Tool. *J Clin Oncol.* 2018;36(13):1284-90.
8. Bennett M, Sharma M. Cancer-related Pain. In: Weiss A, Taylor J, Searle R, editors. *Core standards for pain management services in the UK.* 2 ed. London: Faculty of pain medicine of the royal college of anaesthetists; 2021. p. 88-90.
9. Chapman EJ, Edwards Z, Boland JW, Maddocks M, Fettes L, Malia C, et al. Practice review: Evidence-based and effective management of pain in patients with advanced cancer. *Palliative medicine.* 2020;34(4):444-53.
10. Fallon M, Giusti R, Aielli F, Hoskin P, Rolke R, Sharma M, et al. Management of cancer pain in adult patients: ESMO Clinical Practice Guidelines. *Ann Oncol.* 2018.
11. World Health Organisation. WHO guidelines for the pharmacological and radiotherapeutic management of cancer pain in adults and adolescents. 2019.
12. Kasasbeh MAM, McCabe C, Payne S. Cancer-related pain management: A review of knowledge and attitudes of healthcare professionals. 2017;26(6):e12625.
13. Levell NJ. NHS outpatient secondary care: a time of challenges and opportunities. *Future healthcare journal.* 2022;9(2):106-12.
14. Graupner C, Breukink SO, Mul S, Claessens D, Slok AHM, Kimman ML. Patient-reported outcome measures in oncology: a qualitative study of the healthcare professional's perspective. *Supportive Care in Cancer.* 2021;29(9):5253-61.
15. Steven B, Lange L, Schulz H, Bleich C. Views of psycho-oncologists, physicians, and nurses on cancer care—A qualitative study. *PLOS ONE.* 2019;14(1):e0210325.
16. Braun V, Clarke, V. *Thematic analysis: A practical guide.* SAGE publications. 2021.
17. Ruben MA, van Osch M, Blanch-Hartigan D. Healthcare providers' accuracy in assessing patients' pain: A systematic review. *Patient Education and Counseling.* 2015;98(10):1197-206.
18. Thestrup Hansen S, Kjerholt M, Friis Christensen S, Brodersen J, Hølge-Hazelton B. User experiences on implementation of patient reported outcome measures (PROMs) in a Haematological outpatient clinic. *Journal of Patient-Reported Outcomes.* 2020;4(1):87.
19. Bennett MI, Mulvey MR, Campling N, Latter S, Richardson A, Bekker HG, et al. Self-management toolkit and delivery strategy for end-of-life pain: the mixed-methods feasibility study. *Health Technology Assessment Programme.* 2017;21 (76).
20. Buonanno P, Marra A, Iacovazzo C, Franco M, De Simone S. Telemedicine in Cancer Pain Management: A Systematic Review and Meta-Analysis of Randomized Controlled Trials. *Pain Medicine.* 2023;24(3):226-33.

- 1
- 2
- 3 21. Alese OB, Zhang C, Zakka KM, Kim S, Wu C, Shaib W, et al. A cost analysis of managing cancer-
- 4 related pain among hospitalized US cancer patients. 2020;38(15\_suppl):7079-.
- 5
- 6 22. Guven Ozdemir N. The Development of Nurses' Individualized Care Perceptions and Practices:
- 7 Benner's Novice to Expert Model Perspective. 2019;12:2-1279.
- 8
- 9
- 10
- 11
- 12
- 13
- 14
- 15
- 16
- 17
- 18
- 19
- 20
- 21
- 22
- 23
- 24
- 25
- 26
- 27
- 28
- 29
- 30
- 31
- 32
- 33
- 34
- 35
- 36
- 37
- 38
- 39
- 40
- 41
- 42
- 43
- 44
- 45
- 46
- 47
- 48
- 49
- 50
- 51
- 52
- 53
- 54
- 55
- 56
- 57
- 58
- 59
- 60

For peer review only

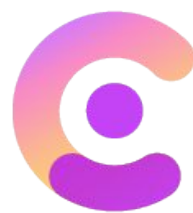

# The Capture Study

Improving pain control for people living with cancer

---

## Interview topic guide

---

### ❖ **Professional Background**

*(role, experience, knowledge/training in pain assessment and management, contact with advanced cancer patients)*

### ❖ **Experiences of conducting pain assessments to support to people with advanced cancer**

- Assessment
  - Basic: pain intensity and interference
  - Detailed: underlying aetiology and pain mechanism, linked analgesic prescribing
- Decision-making
- Access to cancer pain management guidelines
- Providing cancer treatments and care
- Communication between oncology and patient
- Follow-up contact between patient and hcp

### ❖ **Identifying triggers for pain assessment**

- *what factors would lead doctor or nurse to undertake a pain assessment*

### ❖ **Specific examples of cancer pain assessments that have been conducted**

- *Talk us through how pain is assessed and managed in practice*

### ❖ **Examples of existing tools used in everyday pain assessment practice**

- *What works with this pain assessment tool or needs improving?*
- *Any challenges with using the tools in everyday practice?*

### ❖ **Anything that is difficult when people have advanced cancer to assess and manage their pain?**

### ❖ **Anything that works well?**

*N.B. Additional questions may be added as the interviews progress and relevant topics begin to be identified from previous interviews conducted.*

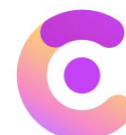

1  
2  
3  
4  
5  
6  
7  
8  
9  
10  
11  
12  
13

❖ ***Suggestions for how pain assessment could be improved for people with advanced cancer?***

14 To ask participants that have insight and knowledge into existing clinical pathways:

15  
16  
17  
18  
19  
20  
21  
22  
23  
24  
25  
26  
27  
28  
29  
30  
31  
32  
33  
34  
35  
36  
37  
38  
39  
40  
41  
42  
43  
44  
45  
46  
47  
48  
49  
50  
51  
52  
53  
54  
55  
56  
57  
58  
59  
60

❖ ***Implementing routine pain assessment within existing clinical pathways***

- Describe how a new treatment or procedure is currently integrated into an outpatient service?
- Who is responsible for making sure everyone is trained and using the new treatment or procedure?
- How can routine pain assessments be integrated into existing clinical pathways in your oncology outpatient service?
- Explain what these improvements might make?
- Any potential system level challenges?

❖ ***Anything you would like to add?***

*N.B. Additional questions may be added as the interviews progress and relevant topics begin to be identified from previous interviews conducted.*



**SRQR 21-point checklist**

| No. | Topic                                                                | Completed                           | Page no. |
|-----|----------------------------------------------------------------------|-------------------------------------|----------|
| 1.  | Title                                                                | <input checked="" type="checkbox"/> | 1        |
| 2.  | Abstract                                                             | <input checked="" type="checkbox"/> | 2        |
| 3   | Problem formulation                                                  | <input checked="" type="checkbox"/> | 3        |
| 4.  | Purpose or research question                                         | <input checked="" type="checkbox"/> | 4        |
| 5.  | Qualitative approach                                                 | <input checked="" type="checkbox"/> | 4        |
| 6.  | Research characteristics and reflexivity                             | <input checked="" type="checkbox"/> | 5        |
| 7.  | Context                                                              | <input checked="" type="checkbox"/> | 4        |
| 8.  | Sampling strategy                                                    | <input checked="" type="checkbox"/> | 4        |
| 9.  | Ethical Issues                                                       | <input checked="" type="checkbox"/> | 5/18     |
| 10. | Data collection methods                                              | <input checked="" type="checkbox"/> | 5        |
| 11. | Data collection instruments and technologies                         | <input checked="" type="checkbox"/> | 5        |
| 12. | Units of study                                                       | <input checked="" type="checkbox"/> | 6        |
| 13. | Data processing                                                      | <input checked="" type="checkbox"/> | 5        |
| 14. | Data analysis                                                        | <input checked="" type="checkbox"/> | 6/7      |
| 15. | Techniques to enhance trustworthiness                                | <input checked="" type="checkbox"/> | 5        |
| 16. | Synthesis and interpretation                                         | <input checked="" type="checkbox"/> | 5        |
| 17. | Links to empirical data                                              | <input checked="" type="checkbox"/> | 8-13     |
| 18. | Integration with prior work, implications, and contribution to field | <input checked="" type="checkbox"/> | 14-16    |
| 19. | Limitations                                                          | <input checked="" type="checkbox"/> | 16       |
| 20. | Conflict of interest                                                 | <input checked="" type="checkbox"/> | 18       |
| 21. | Funding                                                              | <input checked="" type="checkbox"/> | 18       |

# BMJ Open

## Exploration of pain assessment and management processes in oncology outpatient services with healthcare professionals: a qualitative study

|                                 |                                                                                                                                                                                                                                                                                                                                                                                                                                                                                                                                                                                                                                                                                                                                                                                                                                                                                                                                                                                                                                |
|---------------------------------|--------------------------------------------------------------------------------------------------------------------------------------------------------------------------------------------------------------------------------------------------------------------------------------------------------------------------------------------------------------------------------------------------------------------------------------------------------------------------------------------------------------------------------------------------------------------------------------------------------------------------------------------------------------------------------------------------------------------------------------------------------------------------------------------------------------------------------------------------------------------------------------------------------------------------------------------------------------------------------------------------------------------------------|
| Journal:                        | <i>BMJ Open</i>                                                                                                                                                                                                                                                                                                                                                                                                                                                                                                                                                                                                                                                                                                                                                                                                                                                                                                                                                                                                                |
| Manuscript ID                   | bmjopen-2023-078619.R1                                                                                                                                                                                                                                                                                                                                                                                                                                                                                                                                                                                                                                                                                                                                                                                                                                                                                                                                                                                                         |
| Article Type:                   | Original research                                                                                                                                                                                                                                                                                                                                                                                                                                                                                                                                                                                                                                                                                                                                                                                                                                                                                                                                                                                                              |
| Date Submitted by the Author:   | 25-Sep-2023                                                                                                                                                                                                                                                                                                                                                                                                                                                                                                                                                                                                                                                                                                                                                                                                                                                                                                                                                                                                                    |
| Complete List of Authors:       | Robinson, Olivia Claire; University of Leeds, Leeds Institute of Health Sciences<br>Pini, Simon; University of Leeds, Psychological and Social Medicine;<br>Flemming, Kate; University of York, Health Sciences<br>Campling, Natasha; University of Southampton, School of Health Sciences<br>Fallon, Marie; University of Edinburgh, MRC Institute of Genetics & Molecular Medicine<br>Richards, Suzanne; University of Leeds, Leeds Institute of Health Sciences<br>Mayland, C; The University of Sheffield, Department of Oncology and Metabolism; Sheffield Teaching Hospitals NHS Foundation Trust<br>Boland, Elaine; Hull University Teaching Hospitals NHS Trust, Palliative Medicine<br>Swinson, Daniel; Leeds Teaching Hospitals NHS Trust, St. James's University Hospital<br>Hurlow, Adam; Leeds Teaching Hospitals NHS Trust, Palliative Care Team<br>Hartup, Sue; Leeds Teaching Hospitals NHS Trust, St. James's University Hospital<br>Mulvey, Matthew; University of Leeds, Leeds Institute of Health Sciences |
| <b>Primary Subject Heading</b>: | Oncology                                                                                                                                                                                                                                                                                                                                                                                                                                                                                                                                                                                                                                                                                                                                                                                                                                                                                                                                                                                                                       |
| Secondary Subject Heading:      | Oncology, Qualitative research                                                                                                                                                                                                                                                                                                                                                                                                                                                                                                                                                                                                                                                                                                                                                                                                                                                                                                                                                                                                 |
| Keywords:                       | Cancer pain < ONCOLOGY, QUALITATIVE RESEARCH, Adult oncology < ONCOLOGY                                                                                                                                                                                                                                                                                                                                                                                                                                                                                                                                                                                                                                                                                                                                                                                                                                                                                                                                                        |
|                                 |                                                                                                                                                                                                                                                                                                                                                                                                                                                                                                                                                                                                                                                                                                                                                                                                                                                                                                                                                                                                                                |

SCHOLARONE™  
Manuscripts



I, the Submitting Author has the right to grant and does grant on behalf of all authors of the Work (as defined in the below author licence), an exclusive licence and/or a non-exclusive licence for contributions from authors who are: i) UK Crown employees; ii) where BMJ has agreed a CC-BY licence shall apply, and/or iii) in accordance with the terms applicable for US Federal Government officers or employees acting as part of their official duties; on a worldwide, perpetual, irrevocable, royalty-free basis to BMJ Publishing Group Ltd ("BMJ") its licensees and where the relevant Journal is co-owned by BMJ to the co-owners of the Journal, to publish the Work in this journal and any other BMJ products and to exploit all rights, as set out in our [licence](#).

The Submitting Author accepts and understands that any supply made under these terms is made by BMJ to the Submitting Author unless you are acting as an employee on behalf of your employer or a postgraduate student of an affiliated institution which is paying any applicable article publishing charge ("APC") for Open Access articles. Where the Submitting Author wishes to make the Work available on an Open Access basis (and intends to pay the relevant APC), the terms of reuse of such Open Access shall be governed by a Creative Commons licence – details of these licences and which [Creative Commons](#) licence will apply to this Work are set out in our licence referred to above.

Other than as permitted in any relevant BMJ Author's Self Archiving Policies, I confirm this Work has not been accepted for publication elsewhere, is not being considered for publication elsewhere and does not duplicate material already published. I confirm all authors consent to publication of this Work and authorise the granting of this licence.

1  
2  
3  
4 1  
5  
6 2 **Title:**  
7  
8  
9 3 Exploration of pain assessment and management processes in oncology outpatient services  
10  
11 4 with healthcare professionals: a qualitative study  
12  
13  
14 5

16  
17 6 **Authors:**  
18

19  
20 7 Robinson, OC<sup>1</sup>. Pini, S<sup>1</sup>. Flemming, K<sup>2</sup>. Campling, N<sup>3</sup>. Fallon, M<sup>4</sup>. Richards, SH<sup>1</sup>.  
21  
22 8 Mayland, CR<sup>5,8</sup>. Boland, E<sup>6</sup>. Swinson, D<sup>7</sup>. Hurlow, A<sup>7</sup>. Hartup, S<sup>7</sup>. Mulvey, MR.<sup>1</sup>  
23  
24  
25

26 9  
27  
28

29  
30 10 **Affiliations:**  
31

32 11 <sup>1</sup> Leeds Institute of Health Sciences, University of Leeds, Level 10 Worsley Building,  
33 Clarendon Way, Leeds, LS2 9NL, UK.  
34

35 13 <sup>2</sup>Department of Health Sciences, University of York, York.  
36  
37

38 14 <sup>3</sup>School of Health Sciences, University of Southampton, Building 67, Highfield,  
39 Southampton SO17 1BJ, England, UK  
40  
41  
42

43  
44 16 <sup>4</sup>Cancer Research UK Edinburgh Centre, MRC Institute of Genetics & Molecular  
45 Medicine, University of Edinburgh, Edinburgh.  
46  
47

48 18 <sup>5</sup>Department of Oncology and Metabolism, University of Sheffield, Sheffield.  
49

50  
51 19 <sup>6</sup>Palliative Medicine, Hull University Teaching Hospitals NHS Trust, Hull.  
52

53 20 <sup>7</sup> St James's University Hospital, Leeds Teaching Hospitals NHS Trust, Leeds.  
54

55  
56 21 <sup>8</sup> Sheffield Teaching Hospitals, NHS Foundation Trust.  
57

58 22  
59  
60



1  
2  
3  
4 23 **Corresponding author**

5  
6  
7 24 Olivia Robinson, Leeds Institute of Health Sciences, University of Leeds, Level 10

8  
9  
10 25 Worsley Building, Clarendon Way, Leeds, LS2 9NL, UK.

11  
12  
13 26 Email: [o.c.robinson@leeds.ac.uk](mailto:o.c.robinson@leeds.ac.uk).

14  
15  
16 27 **Key words**

17  
18  
19 28 Pain Assessment, Oncology, Outpatient, Cancer Pain, Pain Management, Qualitative,

20  
21  
22 29 Semi-structured interviews.

23  
24  
25 30 **Abstract**

26  
27  
28 31 **Objectives:** This study explored cancer pain management practices and clinical care  
29 32 pathways used by healthcare professionals (HCPs) to understand the barriers and  
30 33 facilitators for standardised pain management in oncology outpatient settings (OS).

31  
32  
33 34  
34 35 **Design:** Data were collected using semi-structured interviews that were audio-  
35 36 recorded and transcribed. The data was analysed using Thematic Analysis.

36  
37  
38 38 **Setting:** Three NHS trusts with oncology OS in Northern England.

39  
40  
41 40 **Participants:** Twenty HCPs with varied roles (e.g. oncologist, nurse) and experiences  
42 41 (e.g. registrar, consultant) from different cancer site clinics (e.g. breast, lung). Data  
43 42 were analysed using Thematic Analysis.

44  
45  
46 44 **Results:** HCPs discussed cancer pain management practices during consultation and  
47 45 supporting continuity of care beyond consultation. Key findings included: (1) HCPs'  
48 46 level of clinical experience influenced pain assessments; (2) remote consulting  
49 47 impeded experienced HCPs to do detailed pain assessments; (3) diffusion of HCP  
50 48 responsibility to manage cancer pain; (4) nurses facilitated pain management support

1  
2  
3  
4 49 with patients; and, (5) continuity of care for pain management was constrained by the  
5 50 integration of multi-disciplinary teams.  
6

7 51

8  
9 52 **Conclusions:** These data demonstrate HCP cancer pain management practices varied  
10 53 and were unstructured. Recommendations are made for a standardised cancer pain  
11 54 management intervention: (1) detailed evaluation of pain with a tailored self-  
12 55 management strategy; (2) implementation of a structured pain assessment that  
13 56 supports remote consultations, (3) pain assessment tool that can support both  
14 57 experienced and less experienced clinicians. These findings will inform the  
15 58 development of a cancer pain management tool to integrate within routine oncology  
16 59 OS.  
17  
18  
19  
20  
21  
22

23 60

### 24 25 26 61 **Strengths and Limitations of this study**

27  
28 62 - To our knowledge, this is one of the first qualitative studies that has provided a  
29 63 descriptive account of cancer pain management processes and experiences in  
30 64 oncology outpatient settings from the perspective of healthcare professionals.  
31  
32

33 65

34  
35 66 - A structured sampling framework was used to ensure a heterogeneous sample  
36 67 of roles, seniority and clinical speciality were recruited to the study. This  
37 68 enabled a detailed understanding to different types of pain prevalence patients  
38 69 experienced.  
39  
40  
41  
42

43 70

44  
45 71 - Our recruitment strategy (i.e. self-referral sampling after receiving an  
46 72 information pack) may have led to bias, as individuals with strong negative or  
47 73 positive views may have been more likely to self-refer and agree to participate  
48 74 to the study.  
49  
50  
51  
52

53 75  
54  
55  
56  
57  
58  
59  
60

## 76 Introduction

77 In the UK, approximately 167,000 people die of cancer each year (1) of whom half will  
78 experience moderate to severe pain, and a third are undertreated for their pain (2, 3).

79 Under-treatment of cancer pain reduces patients' quality of life and increases  
80 healthcare service use and costs (3). For patients, the burden of chronic cancer-pain  
81 is associated with anxiety, depression (4) and significantly reduces physical and  
82 emotional wellbeing (5).

83 The underlying pathophysiology of cancer pain is complex; nociceptive, inflammatory,  
84 and neuropathic mechanisms exist in concert with psychological and emotional  
85 components of chronic pain, making cancer pain challenging to manage clinically (6)  
86 (7). Historically, the management of cancer pain has been based on evaluating the  
87 subjective intensity of pain (via 0-10 Likert scales) (8) which do not evaluate aetiology,  
88 mechanisms or psychological components of pain (9). In addition, the challenging  
89 clinical environment within an oncology outpatient department means that cancer pain  
90 management is one of many competing priorities that healthcare professionals (HCPs)  
91 must manage during a time-limited consultation. In the UK and Europe, cancer  
92 patients are mainly treated at oncology outpatient services (OS), within secondary or  
93 tertiary healthcare systems. Care in OS differs from inpatient hospital settings;  
94 outpatient clinics are dedicated services patients visit for specific appointments, so  
95 their care can be monitored, reviewed and treated by HCPs (i.e. oncologists, nurses).  
96 Despite support given to cancer patients at outpatient clinics, uncontrolled cancer pain  
97 is the most common reason for contacting GP out-of-hours services (10).

1  
2  
3  
4 98 When cancer pain is routinely assessed on hospital wards or in outpatient clinics, this  
5  
6 99 improves pain control for patients (11). The UK Faculty of Pain Medicine has published  
7  
8  
9 100 Core Standards for cancer pain management (12) which state that cancer patients  
10  
11 101 should receive a pain assessment at each encounter with an oncology clinician that  
12  
13  
14 102 covers intensity, mechanisms, aetiology and impact. Yet, oncology literature shows  
15  
16 103 there is currently no standardised procedure for managing pain in an outpatient setting  
17  
18  
19 104 (13). Despite decades of national and international guidelines on cancer pain  
20  
21 105 management (6, 8) inadequate pain assessment continues to be a barrier to good pain  
22  
23 106 control for patients with cancer. Wider oncology literature has suggested HCPs  
24  
25 107 required more educational opportunities for prescribing complex pain relief  
26  
27 108 medications to cancer patients (14).  
28  
29  
30  
31  
32  
33 109 External factors can also influence effective pain management processes. In the UK,  
34  
35 110 referral to oncology begins in primary care, this is community-based care provided by  
36  
37 111 general practitioners (GPs). Reduced referrals from primary care during the COVID-  
38  
39 112 19 pandemic has led to an increase in the numbers of patients diagnosed with  
40  
41 113 advanced cancer post-pandemic. This has been compounded by staff shortages in  
42  
43 114 oncology OS and increasing levels of sickness absence and burnout in the workforce  
44  
45  
46 115 (15). In the UK, minimal qualitative studies have explored current pain management  
47  
48 116 practices for people with cancer in oncology OS. The aim of this qualitative  
49  
50  
51 117 investigation was to describe cancer pain management practices and clinical care  
52  
53 118 pathways for cancer pain management used by HCPs to understand the barriers and  
54  
55  
56 119 facilitators for standardised pain management in oncology OS.  
57  
58  
59  
60

1  
2  
3  
4 1205  
6 121 **Methods**7  
8  
9 12210  
11  
12 123 **Design**13  
14 124 Qualitative interview study exploring pain management practices for people with  
15 125 cancer in oncology OS from the perspective of HCPs.  
16  
17  
18  
19

20 126

21  
22 127 **Research participants**23  
24 128 HCPs were recruited from oncology OS in three National Health Service (NHS) trusts  
25 129 in Northern England. Eligible HCPs were required to have at least 6-months  
26 130 experience of managing cancer pain in an oncology outpatient setting. Purposive  
27 131 sampling was used to recruit participants that had varied job roles (oncologist, clinical  
28 132 nurse specialist (CNS)), with a staff sample to reflect different staff grades (consultant,  
29 133 registrar), working from a range of outpatient sub-specialities (lung, breast, bowel).  
30  
31  
32  
33  
34  
35  
36  
37  
38  
39  
40  
41 134 This ensured a broad range of experiences of cancer pain assessment, support and  
42  
43  
44 135 management for patients with differing disease trajectories were included in the  
45  
46 136 sample.  
47  
48

49 137

50  
51  
52 138 **Recruitment**53  
54 139 Eligible HCPs were identified and recruited via co-applicant HCPs embedded within  
55  
56  
57 140 the clinical teams, who emailed study information packs (i.e. information sheet,  
58  
59  
60

1  
2  
3  
4 141 consent form) to their entire clinical teams. Contact information of the research team  
5  
6 142 (OR/MM) was included in study information packs and potentially eligible participants  
7  
8  
9 143 were asked to contact the research team (OR/MM). When potentially eligible  
10  
11 144 participants contacted the research team (OR/MM) the study was discussed in detail,  
12  
13  
14 145 any questions answered, and a date/time arranged for an interview. Interviews were  
15  
16 146 conducted through telephone and video calling software to suit the participants. Verbal  
17  
18  
19 147 consent was obtained by OR at the beginning of the interview. The consent audio was  
20  
21  
22 148 recorded and stored separately to the main interview recording.  
23

24 149

## 26 150 **Patient and Public Involvement**

29 151

31 152 A patient and public involvement (PPI) group was established at the beginning of the  
32  
33 153 project. Our PPI group included people with personal experiences of managing cancer  
34  
35  
36 154 pain and one former carer. One PPI member was also a grant co-applicant. The PPI  
37  
38  
39 155 group met during the study development phase to contribute to the design and delivery  
40  
41 156 methods. This included providing feedback on the development of study documents  
42  
43  
44 157 and processes. Once data had been collected, transcribed and summarised the PPI  
45  
46  
47 158 group met to provide feedback on the initial themes and sub-themes identified from  
48  
49 159 the data.  
50

51 160

## 54 161 **Data collection**

56 162 Interviews were conducted by OR between March 2022 and May 2022. Sample size  
57  
58  
59 163 was determined based on previous qualitative studies conducted in oncology OS (16,  
60

1  
2  
3  
4 164 17). Recruitment and analysis continued in tandem until data saturation was reached.  
5  
6 165 An interview topic guide was informed by existing literature and expert input from the  
7  
8  
9 166 research and Patient and Public Involvement group (see additional file 1). Participants  
10  
11 167 were asked about their experiences of cancer pain management in oncology OS. This  
12  
13  
14 168 included exploring current practice, challenges and identifying what could be done to  
15  
16  
17 169 improve how pain is managed. OR and MM held weekly meetings to discuss the  
18  
19 170 interviews and influence of researcher bias on the dataset was documented.  
20  
21  
22 171

171

## 172 **Data analysis**

23  
24  
25  
26 173 Data analysis was done using Braun and Clark's Thematic Analysis (18). With consent  
27  
28 174 from participants, interviews were audio-recorded and transcribed verbatim by OR and  
29  
30  
31 175 LA. Analysis was an inductive-deductive process derived from participant interviews;  
32  
33  
34 176 preliminary analyses was undertaken throughout the data collection process and the  
35  
36  
37 177 topic guide was adjusted accordingly to explore existing and new patterns identified  
38  
39 178 within the data. After familiarising themselves with the transcripts, initial coding and  
40  
41  
42 179 development of themes was done by OR, MM and SP. Through a series of data  
43  
44 180 analysis meetings, the initial themes and sub-themes were presented to the wider  
45  
46  
47 181 research team and our PPI group to explore their meaning and significance. During  
48  
49  
50 182 these meetings each theme and sub-theme was described in detail and supporting  
51  
52 183 evidence (codes and quotes) was presented and discussed. Following each data  
53  
54  
55 184 analysis meeting the themes and sub-themes were refined in an iterative process until  
56  
57  
58  
59  
60

1  
2  
3  
4 185 the themes were agreed. Anonymised verbatim quotes from the data were used to  
5  
6 186 illustrate and give credibility to findings.  
7  
8  
9 187

10  
11  
12  
13  
14  
15  
16  
17  
18  
19  
20  
21  
22  
23  
24  
25  
26  
27  
28  
29  
30  
31  
32  
33  
34  
35  
36  
37  
38  
39  
40  
41  
42  
43  
44  
45  
46  
47  
48  
49  
50  
51  
52  
53  
54  
55  
56  
57  
58  
59  
60

For peer review only



188 **Results**

189 Interviews were conducted with 20 HCPs from three NHS trusts, lasting between 30-  
 190 minutes to 45-minutes (Table 1. Participant characteristics).

191

192 *Table 1. Participant characteristics (N=20)*

| Participant characteristics            |    |
|----------------------------------------|----|
| <i>Healthcare professionals (n=20)</i> |    |
| Male                                   | 8  |
| Female                                 | 12 |
| Role                                   |    |
| Consultant                             | 12 |
| Clinical Nurse Specialist (CNS)        | 3  |
| Registrar                              | 4  |
| Pharmacist                             | 1  |
| <i>Cancer sub-speciality area</i>      |    |
| Urology                                | 2  |
| Prostate                               | 2  |
| Skin                                   | 2  |
| Upper Gastrointestinal tract (GI)      | 2  |
| Haematology                            | 5  |

|        |   |
|--------|---|
| Lung   | 6 |
| Breast | 1 |

193

194

### 195 **Thematic analysis**

196 Thorough analysis of the transcripts produced two primary themes: (1) *Pain*  
 197 *management practices during oncology outpatient consultations* and (2) *delivering*  
 198 *continuity of care beyond oncology outpatient consultations* (table 2). Each theme  
 199 contained four sub-themes to further describe the specific elements of each.

200

201

202 *Table 2. Thematic analysis themes and sub-themes*

|                                                                                    |
|------------------------------------------------------------------------------------|
| <b>Theme 1: Pain management practices during oncology outpatient consultations</b> |
|------------------------------------------------------------------------------------|

|                    |
|--------------------|
| <b>Sub-themes:</b> |
|--------------------|

|                                                                 |
|-----------------------------------------------------------------|
| <b>1.1 Staff experience influenced pain assessment practice</b> |
|-----------------------------------------------------------------|

|                                                                                                                             |
|-----------------------------------------------------------------------------------------------------------------------------|
| Assessment of pain was influenced by HCPs seniority and experience, often using clinically based judgements to manage pain. |
|-----------------------------------------------------------------------------------------------------------------------------|

|                                                  |
|--------------------------------------------------|
| <b>1.2 Variation in pain management practice</b> |
|--------------------------------------------------|

|                                                                                                                               |
|-------------------------------------------------------------------------------------------------------------------------------|
| There was variation in when and how HCPs approached cancer pain management during consultations, related to time and rapport. |
|-------------------------------------------------------------------------------------------------------------------------------|

|                                                       |
|-------------------------------------------------------|
| <b>1.3 Remote consulting impacted pain assessment</b> |
|-------------------------------------------------------|

HCPs felt remote consultations impeded even experienced HCPs ability to perform a detailed pain assessment.

#### 1.4 HCP's roles and responsibilities

There was variation in the extent to which HCPs felt responsible to manage cancer pain.

### Theme 2: Continuity of care following oncology outpatient consultations

#### Sub-themes:

#### 2.1 Utilisation of outpatient oncology clinical nurse specialists

HCPs felt oncology speciality nurses had more time to build rapport with patients and enable patients to openly disclose their experience of cancer pain.

#### 2.2 Integration of supportive services

Optimal pain management involved utilising supportive services (i.e. pain management teams) for advice and guidance to develop appropriate treatment pathways.

#### 2.3 Reassessment and monitoring of cancer pain between primary and secondary care

Outpatient clinicians' opportunity to re-assess and monitor cancer pain is constrained by the frequency of appointments.

#### 2.4 Providing patients with supported self-management plans to manage cancer pain at home

HCPs created self-management plans for patient to ensure their cancer pain was adequately reviewed.

203

### 204 Pain management practices during oncology outpatient consultations

205 Participants reported factors such as time, rapport, mode of assessment (i.e.  
206 telephone) and diffusion of responsibility influenced the extent pain management was  
207 explored with patients.

1  
2  
3  
4 208 Staff experience influenced pain assessment practice

5  
6 209 Assessment of pain in outpatient clinics was influenced by individual HCP's seniority  
7  
8  
9 210 and experience. Experienced consultants expressed confidence assessing and  
10  
11 211 treating cancer pain because it was an area of care they *"do a lot of"*-[P012].  
12  
13  
14 212 Experienced HCPs stated *"I don't use any pain guidelines"*-[P011] or *"I just pull on my*  
15  
16 213 *own experience"*-[P013] to describe how pain was assessed in practice. Senior staff  
17  
18  
19 214 appeared more likely to use tacit knowledge in addition to drawing on clinically based  
20  
21  
22 215 observations (i.e. non-verbal behaviours) and conversations with the patient before  
23  
24  
25 216 determining an appropriate treatment plan:

26  
27  
28 217 *"They [the HCP] might be looking at how far can you lift the leg, the pressure*  
29  
30 218 *that they can put on the leg and how much feeling there is on the leg"* P004  
31  
32  
33 219 *[CNS, haematology clinic]*

34  
35  
36 220 HCPs used open-ended questions that *"triggered"*-[P011] patients to discuss pain or  
37  
38  
39 221 discomfort followed by an assessment for severity of pain. Using a verbal description  
40  
41  
42 222 of a numerical pain intensity scale encouraged patients to *"score it, 0-10"*-[P009]. Yet,  
43  
44  
45 223 several HCPs felt pain scales did not provide a valid representation of a patient's pain  
46  
47 224 because the subjective nature of pain made it *"difficult to apply to numbers"*- [P006].  
48  
49  
50 225 Asking questions associated with the type of cancer, initiated patients to think in-depth  
51  
52 226 about the context, triggers, occurrences and nature of the pain:  
53  
54  
55  
56  
57  
58  
59  
60

1  
2  
3  
4 227 *“Thoracic cancers I’d always ask about chest pain specifically and risk of pain*  
5  
6 228 *or swelling outside of the chest and with gynaecological cancers I’d say “have*  
7  
8 229 *you had any abdominal pain or bloating” P008 [Registrar, lung clinic]*

10  
11  
12 230

13  
14  
15 231 Variation in pain management practice

16  
17  
18 232 There was variation in when and how HCPs approached cancer pain management  
19  
20 233 during consultations, related to time, rapport and location. Participants stated pain  
21  
22 234 management conversations required *“empathy and sensitivity”* – [P001], yet  
23  
24 235 developing the necessary rapport took time. Participants suggested patients received  
25  
26 236 pain assessments at different points in a care journey, i.e. initial or follow-up  
27  
28 237 consultations. HCPs acknowledged the extent to which pain management was  
29  
30 238 approached and communicated to patients depended on specific diagnosis groups  
31  
32 239 with differing levels of associated pain. If HCPs were seeing a *“new cancer patient*  
33  
34 240 *with less pain”- [P008]* consultants prioritised other areas of the patient’s care (i.e.  
35  
36 241 arranging treatment, discussing patient concerns):

37  
38  
39 242 *“If I’m consenting them for radiotherapy a lot of them won’t really be having any*  
40  
41 243 *pain, so you know I’ll ask, and if they’re saying no, then that’s fine” P008*  
42  
43 244 *[Registrar, Lung clinic]*

44  
45  
46 245 HCPs suggested discussing other areas of cancer-related care meant opportunities  
47  
48 246 for an in-depth, detailed pain assessment were potentially lost. For patients with  
49  
50 247 specific cancer types, where pain was highly prevalent, HCPs tacit pain assessment

1  
2  
3  
4 248 identified pain management as a priority. HCPs made clinical judgements on the  
5  
6 249 extent and timing of pain management discussions. This included recognising when  
7  
8  
9 250 external factors could potentially exacerbate pain, for example, “*frailty in older patients,*  
10  
11 251 *comorbidities or smoking*”- [P003].

12  
13  
14 252 “*Some patients are straightforward. Whereas a lot of lung patients have been*  
15  
16  
17 253 *heavy smokers. They've got COPD and ischemic heart disease...where you*  
18  
19  
20 254 *really have got to get into conversations about pain in a big way*” P003  
21  
22 255 *[Consultant, haematology clinic]*

23  
24  
25 256 HCPs suggested follow-up consultations were variable and depended on the care  
26  
27  
28 257 needs and severity of the patient’s cancer. For patients with advanced cancer that  
29  
30  
31 258 were seen weekly it could be easier to monitor and explore pain. HCPs described  
32  
33 259 difficulties with building rapport to explore pain when appointments were infrequent  
34  
35  
36 260 and patients did not see the same HCP at follow-up appointments.

37  
38  
39 261

40  
41  
42 262 Remote consulting impacted pain assessment

43  
44  
45 263 Management of oncology outpatient care has changed since COVID-19 pandemic and  
46  
47  
48 264 more consultations are conducted remotely. HCPs described advantages to remote  
49  
50  
51 265 consulting as it enabled easier, more frequent contact with patients and supported  
52  
53 266 continuity of care:

54  
55  
56 267 “*We would, you know put that as part of our diary for the following day to call*  
57  
58  
59 268 *back and see. Make sure that it was working*” P005 [CNS, upper GI clinic]

1  
2  
3  
4 269 However, some HCPs found remote consulting prevented non-verbal observations of  
5  
6 270 pain and experienced clinicians recognised that this impeded their ability to do a  
7  
8  
9 271 detailed pain assessment:

10  
11  
12 272 *“And saying to a patient, is it the lumbar region? Why would they know that”*

13  
14  
15 273 *P004 [CNS, haematology clinic]*

16  
17  
18 274 HCPs described a risk of patients misattributing cancer-related pain for side effects  
19  
20 275 and symptoms during remote consultations, making it challenging to provide  
21  
22  
23 276 appropriate treatment. HCPs had to *“take [it] on the patient’s own word”-[P002]* feeling  
24  
25  
26 277 there was *“no other option”- [P002]*. Some HCPs felt pain assessments began from  
27  
28 278 observations of non-verbal cues when *“they call the patient from the waiting room”-*  
29  
30  
31 279 *P011*, which was not possible in telephone consultations. This contributed to the  
32  
33  
34 280 overall judgement of the patient’s pain:

35  
36  
37 281 *“You notice whether they’re in a wheelchair, how they’re able to get out of their*

38  
39 282 *chair, whether they can walk down the corridor as fast or slower than you can”*

40  
41  
42 283 *P018 [Consultant, breast clinic].*

43  
44  
45 284

46  
47  
48  
49 285 Healthcare professional’s roles and responsibilities

50  
51 286 There was a diffusion of responsibility when HCPs discussed pain management. Due  
52  
53  
54 287 to other community-based HCPs (i.e. GPs, palliative care teams) also being able to  
55  
56  
57 288 monitor and manage a patient’s pain, some oncologists in secondary care felt it was  
58  
59 289 not their responsibility therefore did not engage in detailed pain conversations, e.g. it  
60

1  
2  
3  
4 290 was a “community palliative nurse’s job to manage pain”- [P003]. However, HCPs did  
5  
6 291 not want to put a patient at risk of uncontrolled pain whilst they were waiting to discuss  
7  
8  
9 292 this pain with the patient’s community teams and thus developed a self-management  
10  
11 293 plan for the patient to follow:

12  
13  
14 294 *“You’re thinking about, well, the patient could be suffering tonight. You know, I*  
15  
16  
17 295 *can maybe address some of these issues now” P003 [Consultant, haematology*  
18  
19  
20 296 *clinic].*

21  
22  
23 297 Some HCPs described how patients needed to take “ownership”-[P014] and  
24  
25 298 “responsibility”-[P003] to disclose if they were experiencing pain because patients  
26  
27  
28 299 often withheld the extent of their pain due to “fears of bothering the clinician”- [P008]  
29  
30  
31 300 making it more challenging to accurately assess and manage. In some instances,  
32  
33  
34 301 HCPs felt patients needed to provide honest opinions to support a thorough  
35  
36 302 assessment and avoid uncontrolled pain:

37  
38  
39 303 *“You know autonomy to the patient and responsibility to the patient to tell you if*  
40  
41  
42 304 *there’s a problem you know” P014 [Registrar, upper GI clinic]*

43  
44  
45 305

46  
47  
48 306

### 307 **Continuity of care following oncology outpatient consultations**

308 Participants indicated continuity of care for pain management was facilitated by CNS,  
309 relationships between oncology HCPs and supportive services (i.e. palliative care



1  
2  
3  
4 310 teams, pain management services), re-assessment and monitoring of cancer pain  
5  
6 311 between primary and secondary care and self-management plans to manage cancer  
7  
8  
9 312 pain at home.

10  
11  
12 313 Utilisation of outpatient oncology CNS

13  
14 314 Most registrars and consultants entrusted CNS with following up patients and  
15  
16  
17 315 providing pain management support beyond their initial consultation with an  
18  
19  
20 316 oncologist. This was a component of the CNS role to undertake follow-up remote  
21  
22  
23 317 consultations (i.e. telephone or video call) including the re-assessment of pain and  
24  
25 318 other symptoms:

26  
27  
28 319 *"I have the support of CNSs, it will be within days [referring to follow-up calls],*  
29  
30 320 *you know hopefully within a week then I have somebody else checking in on*  
31  
32  
33 321 *them as to whether medication levels need increasing" P007 [Consultant,*  
34  
35 322 *prostate clinic].*

36  
37  
38  
39 323 Consultants reflected on a CNS ability to build rapport with patients and provide a  
40  
41  
42 324 personalised continuity of care making patients more willing to openly disclose their  
43  
44  
45 325 pain. One example showed CNS identifying problematic pain with a patient and  
46  
47  
48 326 escalating this to the consultant to be explored further at follow-up consultations so  
49  
50 327 changes can be made to medication:

51  
52  
53 328 *"If there's a note or a, verbal reminder [referring to a nurse providing notes to a*  
54  
55 329 *consultant about a patient's pain]. Actually, they have had some problems with*

1  
2  
3  
4 330 *pain or this particular issue then that definitely works well” P011 [Consultant,*  
5  
6 331 *haematology clinic].*  
7  
8

9 332 If there were little or no CNS staff available to support the management of pain  
10  
11 333 following consultations with an oncologist, participants suggested it placed strain on  
12  
13 334 other HCPs to fulfil this role. Consultants and registrars expressed concerns for having  
14  
15 335 *“triple booked clinics”- [P003] and calling patients “three hours after their appointment*  
16  
17 336 *time”-[P003] when there were no CNS staff to support clinics.*  
18  
19  
20  
21  
22

23 337

24  
25  
26 338 Integration of supportive services

27  
28  
29 339 Relationships between supportive services (i.e. palliative care, community nursing  
30  
31 340 teams and pain team) and oncology HCPs were essential to cancer pain management.  
32  
33 341 While HCPs expressed confidence in their ability to identify and treat cancer pain,  
34  
35 342 there were circumstances where HCPs described *“reaching their limits”- [P012] on*  
36  
37 343 *providing recommendations on complex opioid medication and required specialist*  
38  
39 344 *support:*  
40  
41  
42  
43  
44

45 345 *“we’re used to drugs like Gabapentin, Amitriptyline but when patients are still*  
46  
47 346 *having pain, that’s when you need help and we’re lucky, we can ring the palliative*  
48  
49 347 *care team and there is somebody that can review the patient...usually you can get*  
50  
51 348 *access to that specialist advice if you need”.P012 [Consultant, lung clinic]*  
52  
53  
54

55  
56 349 In some cases, the level of responsibility and expertise the clinician felt they had over  
57  
58 350 managing a patient’s pain (i.e. pain was important part of consultation discussions)  
59  
60

1  
2  
3  
4 351 influenced whether a patient would be referred to another team or managed by  
5  
6 352 themselves. Data suggested optimal pain management often involved HCPs  
7  
8  
9 353 identifying and monitoring pain whilst utilising supportive services for advice and  
10  
11 354 guidance to develop appropriate treatment pathways.  
12  
13

14 355

15  
16  
17  
18 356 Reassessment and monitoring of cancer pain between primary and secondary  
19  
20 357 care

21  
22  
23 358 Inpatient ward settings enabled HCPs to regularly re-assess cancer pain and make  
24  
25 359 amendments to medication more frequently. In OS a clinicians' opportunity to re-  
26  
27 360 assess and monitor cancer pain was constrained by the frequency of appointments on  
28  
29 361 weekly, monthly or greater basis. Some oncology OS support patients from "*large*  
30  
31 362 *geographical areas*"-[P005] therefore patients might not return for consistent follow-up  
32  
33 363 appointments. Participants reported this made it difficult for HCPs to provide continuity  
34  
35 364 of care and put more dependency on managing cancer pain between primary and  
36  
37 365 secondary care:  
38  
39  
40  
41  
42  
43

44 366 *"What we don't have a mechanism like we do on the ward... We simply don't*  
45  
46 367 *have that contact, so we are next seeing the patients usually in three or six*  
47  
48 368 *weeks' time. So the pattern of medical interaction it simply doesn't map on to*  
49  
50 369 *pain relief"* P018 [Consultant, breast clinic]  
51  
52  
53  
54

55  
56 370 HCPs emphasised pain management decisions needed to be made in line with the  
57  
58 371 patient's needs and their ability to conveniently access primary care. As a result of  
59  
60

1  
2  
3  
4 372 this, patients and HCPs often had to *“rely on the GPs to issue drugs and escalate pain*  
5  
6 373 *control”- [P014].*  
7  
8

9 374 *“We would also encourage patients to seek support from the GP and there will*  
10  
11  
12 375 *come a time when it's beyond our scope” P005 [CNS, upper GI clinic]*  
13  
14

15 376

17  
18 377 Providing patients with supported self-management plans to manage cancer  
19  
20  
21 378 pain at home  
22

23  
24 379 Due to the challenges with assessment and re-assessment in OS, some HCPs  
25  
26 380 suggested providing a *“safety net”-[P016]*for the patient was a crucial aspect to ensure  
27  
28  
29 381 cancer pain was adequately reviewed. This involved developing a strategy so a patient  
30  
31 382 knew what to do if the pain relief was not effective or if they were still experiencing  
32  
33  
34 383 severe pain:  
35  
36

37 384 *“I want you to see how those go and then perhaps give them a time period, so this*  
38  
39  
40 385 *is gonna take a few days for this to start to work better. If things are not any better,*  
41  
42  
43 386 *then to call us back” P016 [Consultant, haematology clinic]*  
44

45 387 Some HCPs provided patients with documentation that included information on how,  
46  
47  
48 388 when and what medication to take, as well as contact information for the OS and out-  
49  
50  
51 389 of-hours services. This was one-way HCPs ensured patients were supported to self-  
52  
53 390 manage cancer pain at home:  
54  
55  
56  
57  
58  
59  
60

1  
2  
3  
4  
5  
6  
7  
8  
9  
10  
11  
12  
13  
14  
15  
16  
17  
18  
19  
20  
21  
22  
23  
24  
25  
26  
27  
28  
29  
30  
31  
32  
33  
34  
35  
36  
37  
38  
39  
40  
41  
42  
43  
44  
45  
46  
47  
48  
49  
50  
51  
52  
53  
54  
55  
56  
57  
58  
59  
60

391 *“If there is anything of concern there is a number that you can call 24 hours a*  
392 *day, 7 days a week, 365 days a year and then we can see them on the acute*  
393 *unit and take it from there” P006 [Registrar, urology clinic]*

For peer review only

1  
2  
3  
4 394 **Discussion**

5  
6 395 We found an unstructured and variable approach to pain management affected  
7  
8 396 multiple components of a patient's outpatient cancer care. Firstly, HCPs used clinical  
9  
10  
11 397 judgement in place of a structured assessment to manage a patient's pain. This  
12  
13  
14 398 explains why HCPs might not use pre-existing guidelines and tools that have been  
15  
16 399 published (6, 8). Research has highlighted disadvantages to using pain assessment  
17  
18  
19 400 tools, such as oversimplification of the multi-dimensional pain experience and not an  
20  
21  
22 401 appropriate reflection of a patient's pain (19). Pain management tools can be efficient  
23  
24  
25 402 especially when HCPs have limited time or when pain assessments are combined with  
26  
27 403 an individualised assessment to fully understand how pain is affecting the patient  
28  
29  
30 404 physically, psychologically, socially and culturally.

31  
32  
33 405 Our data show that pain management in oncology outpatient services was influenced  
34  
35 406 by variation in HCPs' expectation of responsibility for pain management; i.e. it was  
36  
37  
38 407 often considered to be someone else or another services' responsibility. This diffusion  
39  
40  
41 408 of responsibility is well reported in healthcare settings and is known to lead to  
42  
43  
44 409 underperformance of clinical activities and fragmented care in circumstances of  
45  
46 410 shared accountability (20) Fallon et al. (2018) showed that when structured pain  
47  
48  
49 411 assessment processes are implemented within routine clinical care, this leads to a  
50  
51 412 more consistent approach to pain management, a reduction in the diffusion of  
52  
53  
54 413 responsibility and improved pain outcomes for cancer patients (11).

1  
2  
3  
4 414 Our data showed variation across the roles and responsibilities of HCPs supporting  
5  
6 415 the continuity of pain management. Oncology outpatient literature suggests some  
7  
8  
9 416 HCPs perceived their primary duty was to provide patients with their disease status  
10  
11 417 and have conversations around treatment (21). However, our data shows that HCPs  
12  
13  
14 418 who expressed clinical responsibility around pain management were inclined to  
15  
16 419 develop self-management plans to support patients to manage cancer pain at home.  
17  
18  
19  
20 420 This study aimed to describe current pain management and thus the interview topic  
21  
22 421 guide was not developed to explore nuances of self-management practices.  
23  
24  
25 422 However, we know from previous studies there is variation in self-management  
26  
27 423 approaches (22). In OS, development of self-management support for patients is  
28  
29 424 crucial to a continuity of care. This includes providing elements of educational  
30  
31 425 interventions to facilitate problem solving and adequate decision-making skills and  
32  
33 426 tailoring recommendations to the individual's situation and defining goals with action  
34  
35 427 plans (22). By developing supportive plans, it ensures patients understand what to do  
36  
37  
38 428 if pain escalates or becomes unmanageable. Subsequently, it could encourage  
39  
40  
41 429 patients to initiate re-assessment of their pain at primary and secondary care services.  
42  
43  
44  
45  
46 430 We found system-level challenges impacted the extent to which pain was explored  
47  
48 431 with patients and monitored by outpatient HCPs. Exacerbated by the impact of the  
49  
50 432 COVID-19 pandemic, clinics are often over-booked, short staffed, and have long  
51  
52 433 waiting lists (15). In addition, our data show that the complexity surrounding the  
53  
54  
55 434 interface between primary and secondary care and challenges with integration of  
56  
57  
58  
59  
60

1  
2  
3  
4 435 multi-disciplinary teams meant continuity of care, in particular re-assessment and  
5  
6 436 monitoring of pain, was difficult as patients were referred back to primary or community  
7  
8  
9 437 care teams.

10  
11  
12 438 Oncologists found it difficult to build rapport with patients that might not return to  
13  
14 439 outpatient appointments and felt they had to prioritise topics of care with the limited  
15  
16  
17 440 time they had. Consultations take a patient-centred approach that prioritises care  
18  
19  
20 441 practices that are responsive to a patient's preferences and values and thus not  
21  
22 442 focusing on pain management may be appropriate for some patients. However, this  
23  
24  
25 443 study and previous research has highlighted patients can often be reluctant to express  
26  
27  
28 444 their concerns and preferences without prompting (13). This suggests the  
29  
30 445 development of rapport with patients is essential to gain full understanding of a  
31  
32  
33 446 patient's care needs. We found CNS had more opportunities to build rapport and have  
34  
35  
36 447 discussions about pain with patients. However, in line with previous studies (14)  
37  
38 448 opportunities for pain management discussions are often missed if there are nurses  
39  
40  
41 449 with less experience and confidence to conduct pain assessments. Recommendations  
42  
43  
44 450 from this study highlight the benefit of providing training for HCPs to support pain  
45  
46 451 management conversations and embedding this within routine clinical practice.

47  
48  
49 452 Oncology literature has highlighted the benefits for the use of remote consultations in  
50  
51  
52 453 cancer pain management, where it is used appropriately. For example, reduction in  
53  
54  
55 454 pain severity scores, cost-effective, improved accessibility for patients to receive HCP  
56  
57 455 advice and treatment of symptoms and aided monitoring and re-assessment of  
58  
59  
60



1  
2  
3  
4 456 symptoms (23, 24). We found adaptations to pain assessments for remote care  
5  
6 457 impeded experienced HCPs to do a detailed thorough pain assessment, especially if  
7  
8  
9 458 not Audio Visual (AV) facilitated. HCPs become experts in their field through  
10  
11 459 knowledge, skill, training and experiential learning (25). Since COVID-19 the increased  
12  
13  
14 460 use of remote consultations has meant HCPs have to spend more time doing pain  
15  
16 461 assessments remotely. However, due to a lack of experiential learning for conducting  
17  
18  
19 462 pain assessments through remote consultations, this potentially made even  
20  
21  
22 463 experienced HCPs feel like a novice. This coincides with the novice to expert theory  
23  
24 464 (25). Similarly, for those with less experience a change in mode-of-consulting could  
25  
26  
27 465 further impede thorough pain assessments for patients. Without additional support and  
28  
29  
30 466 structured guidance on how to conduct remote consultations there is a risk that  
31  
32 467 patients' pain will not be appropriately managed and key components of a detailed  
33  
34  
35 468 pain assessment potentially missed. Previous research has shown even when pain  
36  
37  
38 469 assessments are standardised and detailed, only modest improvements in pain for  
39  
40 470 patients with cancer are observed, largely because of low delivery fidelity and poor  
41  
42  
43 471 implementation (6). However, Fallon et al. (2018) demonstrated that when  
44  
45 472 standardised pain assessment processes are integrated within routine clinical practice  
46  
47  
48 473 at the level of the service (rather than at an individual clinician level) this leads to  
49  
50  
51 474 greater improvements in pain outcomes for patients and more appropriate analgesic  
52  
53 475 prescribing. This suggests an in-depth implementation plan at service-level would be  
54  
55  
56 476 crucial to the success of a structured pain management intervention.

57  
58  
59 477  
60

1  
2  
3  
4 478 Strengths and limitations  
5

6 479 A structured sampling framework was developed by the research team which may  
7  
8 480 have resulted in potential bias. However, this approach provided a heterogeneous  
9  
10  
11 481 sample of staff roles, seniority and clinical speciality that gave a greater understanding  
12  
13  
14 482 to the management of different types of pain prevalence patients experienced. All  
15  
16 483 participants were from Northern England; therefore, the study's findings may not be  
17  
18  
19 484 generalisable to other regional oncology outpatient settings or international healthcare  
20  
21  
22 485 systems. One limitation is related to our recruitment strategy (i.e. self-referral sampling  
23  
24 486 after HCPs received an information pack); due to the nature of the research aims (i.e.  
25  
26  
27 487 pain management in oncology) participants with strong negative or positive views may  
28  
29  
30 488 have been more likely to agree to participate. However, the themes identified from the  
31  
32 489 data indicated broad perspectives of pain management processes and experience, so  
33  
34  
35 490 it is unlikely that we have sampled an exclusively polarised group of participants.  
36  
37

38 491

39  
40  
41 492 Implications of clinical research and practice  
42

43  
44 493 Faculty of Pain Medicine Core standards for cancer pain management (12) state all  
45  
46 494 patients should receive a pain assessment at each encounter with an oncology  
47  
48  
49 495 clinician that includes exploration of intensity, mechanisms, aetiology and impact.  
50  
51  
52 496 Evidence from clinical trials show that standardising pain assessment in oncology  
53  
54 497 outpatient clinics leads to improvements in patients' pain and quality of life (11). This  
55  
56  
57 498 research recommends the implementation of a structured routine pain assessment  
58  
59  
60

1  
2  
3  
4 499 that minimises the risk of diffusion of responsibility and encourages HCPs to  
5  
6 500 incorporate the most crucial components of a pain assessment into patient  
7  
8  
9 501 consultations (i.e. exploration of intensity, mechanisms, aetiology and impact).  
10  
11 502 Secondly, at a service level, uncontrolled cancer pain remains the most common  
12  
13  
14 503 reason for contacting GP out-of-hours service (10). Implementing a structured pain  
15  
16 504 assessment within oncology OS would encourage patients to report pain earlier,  
17  
18  
19 505 enabling HCPs to manage cancer pain earlier, reducing the burden on GP out-of-hours  
20  
21  
22 506 service, and minimising the risk of patients living with undertreated cancer pain.  
23  
24

## 25 507 Conclusion

26  
27  
28 508 This study demonstrates a variable and unstructured approach to pain management  
29  
30 509 affected multiple components of a patient's outpatient cancer care. We recommend  
31  
32  
33 510 the need for a cancer pain management intervention that standardises pain  
34  
35  
36 511 assessments in oncology OS, which is implemented at the level of the service. This  
37  
38 512 will ensure each patient receives the same detailed evaluation of cancer pain and is  
39  
40  
41 513 provided with a self-management strategy that facilitates pain management beyond  
42  
43 514 consultations.  
44  
45

46 515

## 49 516 List of abbreviations

50  
51  
52  
53 517 HCP – Healthcare Professionals

54  
55  
56 518 OS – Outpatient Services  
57  
58  
59  
60

1  
2  
3  
4 519 CNS – Clinical Nurse Specialist  
5

6  
7 520 Upper GI - Upper Gastrointestinal tract  
8

9  
10 521 NHS – National Health Service  
11

12  
13 522 AV – Audio Visual  
14

15  
16 523  
17

18  
19  
20 524 Declarations  
21

22  
23 525 **Ethical approval and consent to participate**  
24

25  
26 526 Ethical approval was obtained by University of Leeds, Faculty of Medicine Research  
27

28  
29 527 Ethics Committee and Health Research Authority (21/HRA/5245). Approvals were  
30

31  
32 528 also obtained at each NHS trust.  
33

34  
35 529 **Consent for publication**  
36

37  
38 530 Not applicable  
39

40  
41 531 **Availability of data and materials**  
42

43  
44 532 Not applicable  
45

46  
47 533 **Competing interest's statement**  
48

49  
50 534 None declared.  
51

52  
53 535 **Funding**  
54

55  
56 536 This work was supported by Yorkshire Cancer Research grant number L428.  
57  
58  
59  
60

1  
2  
3 **537 Authors' contribution**

4  
5  
6  
7 **538** MM is the chief investigator for this study; he conceived the project, led the design and

8  
9 **539** writing of the study protocol, facilitated data analysis and drafting of this manuscript.

10  
11  
12 **540** Methodology (OR, MM). Project administration (OR, MM).

13  
14  
15 **541** OR wrote the study protocol, including drafting the topic guide, completed data

16  
17 **542** curation, data collection and transcribed interviews. OR led the data analysis and

18  
19 **543** interpretation of the data. Review of interpretation of the data and analysis was done

20  
21 **544** by MM, SP, KF, SR, NC. OR wrote the first draft of the manuscript. Writing-review

22  
23 **545** and editing (OR, MM, SR). All authors (OR, SP, KF, NC, MF, SR, CM, EB, DS, AH,

24  
25 **546** SH, MM) contributed to manuscript revision, read and approved the submitted and

26  
27 **547** revised version.

28  
29  
30  
31  
32  
33  
34 **548**

35  
36  
37 **549 Acknowledgements**

38  
39  
40  
41 **550** Lynn Auty (LA) contributed to the interview transcription.

42  
43  
44 **551** Patient and Public Involvement Group (JG, JP, CA, PD),

45  
46  
47 **552** NHS Trusts: Leeds Teaching Hospitals, Hull University Teaching Hospital, Sheffield

48  
49  
50 **553** University Teaching Hospital

51  
52  
53 **554**

555 **References**

- 556 1. Cancer Research UK. Cancer Mortality Statistics. (2017-2019).
- 557 2. van den Beuken-van Everdingen MH, de Rijke JM, Kessels AG, Schouten HC, van Kleef M, Patijn  
558 J. Prevalence of pain in patients with cancer: a systematic review of the past 40 years. *Ann Oncol.*  
559 2007;18(9):1437-49.
- 560 3. Shen WC, Chen JS, Shao YY, Lee KD, Chiou TJ, Sung YC, et al. Impact of Undertreatment of  
561 Cancer Pain With Analgesic Drugs on Patient Outcomes: A Nationwide Survey of Outpatient Cancer  
562 Patient Care in Taiwan. *J Pain Symptom Manage.* 2017;54(1):55-65 e1.
- 563 4. Kroenke K, Zhong X, Theobald D, Wu J, Tu W, Carpenter JS. Somatic symptoms in patients with  
564 cancer experiencing pain or depression: prevalence, disability, and health care use. *Arch Intern Med.*  
565 2010;170(18):1686-94.
- 566 5. Wang HL, Kroenke K, Wu J, Tu W, Theobald D, Rawl SM. Cancer-related pain and disability: a  
567 longitudinal study. *J Pain Symptom Manage.* 2011;42(6):813-21.
- 568 6. Fallon M, Giusti R, Aielli F, Hoskin P, Rolke R, Sharma M, et al. Management of cancer pain in  
569 adult patients: ESMO Clinical Practice Guidelines. *Ann Oncol.* 2018.
- 570 7. Bennett MI. Mechanism-based cancer-pain therapy. *Pain.* 2017;158 Suppl 1:S74-s8.
- 571 8. World Health Organisation. WHO guidelines for the pharmacological and radiotherapeutic  
572 management of cancer pain in adults and adolescents. 2019.
- 573 9. Mulvey MR, Rolke R, Klepstad P, Caraceni A, Fallon M, Colvin L, et al. Confirming neuropathic  
574 pain in cancer patients: applying the NeuPSIG grading system in clinical practice and clinical research.  
575 *Pain.* 2014;155(5):859-63.
- 576 10. Adam R, Wassell P, Murchie P. Why do patients with cancer access out-of-hours primary care?  
577 A retrospective study. *Br J Gen Pract.* 2014;64(619):e99-104.
- 578 11. Fallon M, Walker J, Colvin L, Rodriguez A, Murray G, Sharpe M. Pain Management in Cancer  
579 Center Inpatients: A Cluster Randomized Trial to Evaluate a Systematic Integrated Approach-The  
580 Edinburgh Pain Assessment and Management Tool. *J Clin Oncol.* 2018;36(13):1284-90.
- 581 12. Bennett M, Sharma M. Cancer-related Pain. In: Weiss A, Taylor J, Searle R, editors. Core  
582 standards for pain management services in the UK. 2 ed. London: Faculty of pain medicine of the royal  
583 college of anaesthetists; 2021. p. 88-90.
- 584 13. Chapman EJ, Edwards Z, Boland JW, Maddocks M, Fettes L, Malia C, et al. Practice review:  
585 Evidence-based and effective management of pain in patients with advanced cancer. *Palliative*  
586 *medicine.* 2020;34(4):444-53.
- 587 14. Kasasbeh MAM, McCabe C, Payne S. Cancer-related pain management: A review of knowledge  
588 and attitudes of healthcare professionals. 2017;26(6):e12625.
- 589 15. Levell NJ. NHS outpatient secondary care: a time of challenges and opportunities. *Future*  
590 *healthcare journal.* 2022;9(2):106-12.
- 591 16. Graupner C, Breukink SO, Mul S, Claessens D, Slok AHM, Kimman ML. Patient-reported  
592 outcome measures in oncology: a qualitative study of the healthcare professional's perspective.  
593 *Supportive Care in Cancer.* 2021;29(9):5253-61.
- 594 17. Steven B, Lange L, Schulz H, Bleich C. Views of psycho-oncologists, physicians, and nurses on  
595 cancer care—A qualitative study. *PLOS ONE.* 2019;14(1):e0210325.
- 596 18. Braun V, Clarke, V. Thematic analysis: A practical guide. SAGE publications. 2021.
- 597 19. Ruben MA, van Osch M, Blanch-Hartigan D. Healthcare providers' accuracy in assessing  
598 patients' pain: A systematic review. *Patient Education and Counseling.* 2015;98(10):1197-206.
- 599 20. Marcotte LM, Kimmel-Morrison J, Liao JM. How to Keep Diffusion of Responsibility From  
600 Undermining Value-Based Care. *AMA journal of ethics.* 2020;22(9):E802-7.
- 601 21. Thestrup Hansen S, Kjerholt M, Friis Christensen S, Brodersen J, Hølge-Hazelton B. User  
602 experiences on implementation of patient reported outcome measures (PROMs) in a Haematological  
603 outpatient clinic. *Journal of Patient-Reported Outcomes.* 2020;4(1):87.

- 1  
2  
3 604 22. Bennett MI, Mulvey MR, Campling N, Latter S, Richardson A, Bekker HG, et al. Self-  
4 605 management toolkit and delivery strategy for end-of-life pain: the mixed-methods feasibility study.  
5 606 Health Technology Assessment Programme. 2017;21 (76).  
6 607 23. Buonanno P, Marra A, Iacovazzo C, Franco M, De Simone S. Telemedicine in Cancer Pain  
7 608 Management: A Systematic Review and Meta-Analysis of Randomized Controlled Trials. Pain  
8 609 Medicine. 2023;24(3):226-33.  
9 610 24. Alese OB, Zhang C, Zakka KM, Kim S, Wu C, Shaib W, et al. A cost analysis of managing cancer-  
10 611 related pain among hospitalized US cancer patients. 2020;38(15\_suppl):7079-  
11 612 25. Guven Ozdemir N. The Development of Nurses' Individualized Care Perceptions and Practices:  
12 613 Benner's Novice to Expert Model Perspective. 2019;12:2-1279.

14  
15 614  
16  
17  
18

19 615  
20  
21  
22  
23  
24  
25  
26  
27  
28  
29  
30  
31  
32  
33  
34  
35  
36  
37  
38  
39  
40  
41  
42  
43  
44  
45  
46  
47  
48  
49  
50  
51  
52  
53  
54  
55  
56  
57  
58  
59  
60

For peer review only

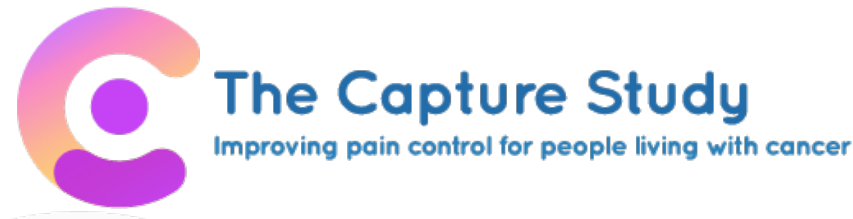

---

## Interview topic guide

---

### ❖ **Professional Background**

*(role, experience, knowledge/training in pain assessment and management, contact with advanced cancer patients)*

### ❖ **Experiences of conducting pain assessments to support to people with advanced cancer**

- Assessment
  - Basic: pain intensity and interference
  - Detailed: underlying aetiology and pain mechanism, linked analgesic prescribing
- Decision-making
- Access to cancer pain management guidelines
- Providing cancer treatments and care
- Communication between oncology and patient
- Follow-up contact between patient and hcp

### ❖ **Identifying triggers for pain assessment**

- *what factors would lead doctor or nurse to undertake a pain assessment*

### ❖ **Specific examples of cancer pain assessments that have been conducted**

- *Talk us through how pain is assessed and managed in practice*

### ❖ **Examples of existing tools used in everyday pain assessment practice**

- *What works with this pain assessment tool or needs improving?*
- *Any challenges with using the tools in everyday practice?*

### ❖ **Anything that is difficult when people have advanced cancer to assess and manage their pain?**

### ❖ **Anything that works well?**

*N.B. Additional questions may be added as the interviews progress and relevant topics begin to be identified from previous interviews conducted.*

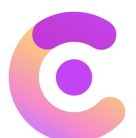



1  
2  
3  
4  
5  
6  
7  
8  
9  
10  
11  
12  
13

❖ ***Suggestions for how pain assessment could be improved for people with advanced cancer?***

14 To ask participants that have insight and knowledge into existing clinical pathways:

15  
16  
17  
18  
19  
20  
21  
22  
23  
24  
25  
26  
27  
28  
29  
30  
31  
32  
33  
34  
35  
36  
37  
38  
39  
40  
41  
42  
43  
44  
45  
46  
47  
48  
49  
50  
51  
52  
53  
54  
55  
56  
57  
58  
59  
60

❖ ***Implementing routine pain assessment within existing clinical pathways***

- Describe how a new treatment or procedure is currently integrated into an outpatient service?
- Who is responsible for making sure everyone is trained and using the new treatment or procedure?
- How can routine pain assessments be integrated into existing clinical pathways in your oncology outpatient service?
- Explain what these improvements might make?
- Any potential system level challenges?

❖ ***Anything you would like to add?***

*N.B. Additional questions may be added as the interviews progress and relevant topics begin to be identified from previous interviews conducted.*



**SRQR 21-point checklist**

| No. | Topic                                                                | Completed                           | Page no. |
|-----|----------------------------------------------------------------------|-------------------------------------|----------|
| 1.  | Title                                                                | <input checked="" type="checkbox"/> | 1        |
| 2.  | Abstract                                                             | <input checked="" type="checkbox"/> | 2        |
| 3   | Problem formulation                                                  | <input checked="" type="checkbox"/> | 3        |
| 4.  | Purpose or research question                                         | <input checked="" type="checkbox"/> | 4        |
| 5.  | Qualitative approach                                                 | <input checked="" type="checkbox"/> | 4        |
| 6.  | Research characteristics and reflexivity                             | <input checked="" type="checkbox"/> | 5        |
| 7.  | Context                                                              | <input checked="" type="checkbox"/> | 4        |
| 8.  | Sampling strategy                                                    | <input checked="" type="checkbox"/> | 4        |
| 9.  | Ethical Issues                                                       | <input checked="" type="checkbox"/> | 5/18     |
| 10. | Data collection methods                                              | <input checked="" type="checkbox"/> | 5        |
| 11. | Data collection instruments and technologies                         | <input checked="" type="checkbox"/> | 5        |
| 12. | Units of study                                                       | <input checked="" type="checkbox"/> | 6        |
| 13. | Data processing                                                      | <input checked="" type="checkbox"/> | 5        |
| 14. | Data analysis                                                        | <input checked="" type="checkbox"/> | 6/7      |
| 15. | Techniques to enhance trustworthiness                                | <input checked="" type="checkbox"/> | 5        |
| 16. | Synthesis and interpretation                                         | <input checked="" type="checkbox"/> | 5        |
| 17. | Links to empirical data                                              | <input checked="" type="checkbox"/> | 8-13     |
| 18. | Integration with prior work, implications, and contribution to field | <input checked="" type="checkbox"/> | 14-16    |
| 19. | Limitations                                                          | <input checked="" type="checkbox"/> | 16       |
| 20. | Conflict of interest                                                 | <input checked="" type="checkbox"/> | 18       |
| 21. | Funding                                                              | <input checked="" type="checkbox"/> | 18       |
